# Supplementary material for: Transcriptome Profiling of Wheat Seedlings following Treatment with Ultrahigh Diluted Arsenic Trioxide
Source: Evid Based Complement Alternat Med. 2014 Nov 27;2014:851263. doi: 10.1155/2014/851263 (PMC4265686; doi:10.1155/2014/851263)
Supplement: Supplementary file 1 — Complete dataset of up- and down-regulated gene sequences, resulting from MapMan analysis, in the four pairwise comparisons. Table S1: poisoned versus control (P+0 vs C+0); Table S2: poisoned-treated versus control (P+T vs C+0); Table S3: treated control versus control (C+T vs C+0); Table S4: poisoned-treated versus poisoned (P+T vs P+0). [file 851263.f1.zip]

Archive with 5 entries (4 files):
- 851263.f1/
- 851263.f1/Table S1.xls
- 851263.f1/Table S2.xls
- 851263.f1/Table S3.xls
- 851263.f1/Table S4.xls
