# Supplementary material for: Transcriptome Profiling of Wheat Seedlings following Treatment with Ultrahigh Diluted Arsenic Trioxide
Source: Evid Based Complement Alternat Med. 2014 Nov 27;2014:851263. doi: 10.1155/2014/851263 (PMC4265686; doi:10.1155/2014/851263)
Supplement: Supplementary file 1 — Complete dataset of up- and down-regulated gene sequences, resulting from MapMan analysis, in the four pairwise comparisons. Table S1: poisoned versus control (P+0 vs C+0); Table S2: poisoned-treated versus control (P+T vs C+0); Table S3: treated control versus control (C+T vs C+0); Table S4: poisoned-treated versus poisoned (P+T vs P+0). [file 851263.f1.zip › 851263.f1/Table S1.xls]

## Sheet: Primary_met
BinCode	BinName	id	type	description	log2FC
AA_metabolism
13.1.1.3.11	amino acid metabolism.synthesis.central amino acid metabolism.alanine.alanine-glyoxylate aminotransferase	ta.6723.3.s1_a_at	Transcript	moderately similar to ( 342)AT4G39660| Symbols: AGT2 | AGT2 (ALANINE:GLYOXYLATE AMINOTRANSFERASE 2); alanine-glyoxylate transaminase | chr4:18406791-18409256 FORWARD gb|BF474804;	1.11
13.1.1.3.11	amino acid metabolism.synthesis.central amino acid metabolism.alanine.alanine-glyoxylate aminotransferase	taaffx.6001.1.s1_s_at	Transcript	weakly similar to ( 118)AT2G13360| Symbols: AGT1, AGT | AGT (ALANINE:GLYOXYLATE AMINOTRANSFERASE) | chr2:5546499-5547984 REVERSE gb|CA693623;	1.25
13.1.2.3	amino acid metabolism.synthesis.glutamate family.arginine	taaffx.82909.1.s1_at	Transcript	gb|CA665054;	1.53
13.1.3.4	amino acid metabolism.synthesis.aspartate family.methionine	ta.1385.1.s1_at	Transcript	highly similar to ( 553)AT5G17920| Symbols: ATMETS, ATMS1, ATCIMS | ATCIMS (COBALAMIN-INDEPENDENT METHIONINE SYNTHASE) | chr5:5935773-5939197 FORWARDhighly similar to ( 556)METE_CATRO gb|CA670445;	1.14
13.1.3.4	amino acid metabolism.synthesis.aspartate family.methionine	taaffx.57475.1.s1_x_at	Transcript	moderately similar to ( 201)AT4G01850| Symbols: SAM-2, MAT2 | MAT2/SAM-2 (S-adenosylmethionine synthetase 2) | chr4:796298-797479 REVERSEmoderately similar to ( 208)METL_ORYSA gb|CA628517;	1.46
13.1.3.5	amino acid metabolism.synthesis.aspartate family.lysine	ta.152.1.s1_at	Transcript	moderately similar to ( 494)AT2G45440| Symbols: DHDPS2 | DHDPS2 (DIHYDRODIPICOLINATE SYNTHASE); dihydrodipicolinate synthase | chr2:18738368-18739941 FORWARDhighly similar to ( 661)DAPA2_WHEAT gb|M60599.1;	1.49
13.1.4.1.1	amino acid metabolism.synthesis.branched chain group.common.acetolactate synthase	ta.6111.1.s1_at	Transcript	weakly similar to ( 130)AT5G16290| Symbols: | acetolactate synthase small subunit, putative | chr5:5333877-5337390 FORWARD gb|AJ603054;	1.06
13.1.4.1.4	amino acid metabolism.synthesis.branched chain group.common.branched-chain amino acid aminotransferase	taaffx.129191.1.s1_at	Transcript	weakly similar to ( 130)AT5G65780| Symbols: ATBCAT-5 | ATBCAT-5; branched-chain-amino-acid transaminase/ catalytic | chr5:26333644-26335811 FORWARD gb|CD906345;	1.19
13.1.5.1.1	amino acid metabolism.synthesis.serine-glycine-cysteine group.serine.phosphoglycerate dehydrogenase	ta.24650.2.a1_a_at	Transcript	moderately similar to ( 301)AT4G34200| Symbols: EDA9 | EDA9 (embryo sac development arrest 9); NAD binding / amino acid binding / binding / catalytic/ cofactor binding / oxidoreductase, acting on the CH-OH group of donors, NAD or NADP as acceptor / phosphoglycerate dehydrogenase | chr4:16374045-16376565 REVERSE gb|BJ320120;	2.06
13.1.5.3	amino acid metabolism.synthesis.serine-glycine-cysteine group.cysteine	ta.23081.2.s1_a_at	Transcript	weakly similar to ( 140)AT5G39890| Symbols: | similar to unknown protein [Arabidopsis thaliana] (TAIR:AT5G15120.1); similar to unnamed protein product [Vitis vinifera] (GB:CAO14912.1); contains InterPro domain Protein of unknown function DUF1637 (InterPro:IPR012864) | chr5:15991771-15993241 FORWARD gb|BJ309300;	1.32
13.1.6.5.4	amino acid metabolism.synthesis.aromatic aa.tryptophan.indole-3-glycerol phosphate synthase	taaffx.123181.1.s1_at	Transcript	very weakly similar to (82.4)AT5G48220| Symbols: | indole-3-glycerol phosphate synthase, putative | chr5:19567665-19569272 FORWARD gb|BE426396;	1.2
13.1.6.5.5	amino acid metabolism.synthesis.aromatic aa.tryptophan.tryptophan synthase	ta.29424.1.a1_a_at	Transcript	weakly similar to ( 166)AT4G02610| Symbols: | tryptophan synthase, alpha subunit, putative | chr4:1147662-1149217 FORWARDweakly similar to ( 177)TRPA_MAIZE gb|CK205869;	1.31
13.1.6.5.5	amino acid metabolism.synthesis.aromatic aa.tryptophan.tryptophan synthase	ta.10688.1.s1_at	Transcript	weakly similar to ( 186)AT4G02610| Symbols: | tryptophan synthase, alpha subunit, putative | chr4:1147662-1149217 FORWARDmoderately similar to ( 259)TRPA_MAIZE gb|AB094060.1;	1.94
13.2.6.3	amino acid metabolism.degradation.aromatic aa.tryptophan	taaffx.131737.1.a1_at	Transcript	moderately similar to ( 277)AT4G31810| Symbols: | enoyl-CoA hydratase/isomerase family protein | chr4:15387371-15390296 REVERSE gb|BJ241423;	-1.24
13.2.6.3	amino acid metabolism.degradation.aromatic aa.tryptophan	ta.25580.1.s1_at	Transcript	moderately similar to ( 252)AT4G16800| Symbols: | enoyl-CoA hydratase, putative | chr4:9454950-9456328 REVERSEVAR1 gb|BJ228692;	2.24
Fermentation
5.10	fermentation.aldehyde dehydrogenase	ta.25596.2.s1_at	Transcript	moderately similar to ( 391)AT3G24503| Symbols: ALDH1A, REF1, ALDH2C4 | ALDH2C4 (REDUCED EPIDERMAL FLUORESCENCE1); 3-chloroallyl aldehyde dehydrogenase/ aldehyde dehydrogenase (NAD) | chr3:8919739-8923036 REVERSEweakly similar to ( 189)BADH_SPIOL gb|BQ788785;	1.14
TCA -transformation
8.1.3	TCA / org. transformation.TCA.aconitase	taaffx.6397.1.s1_s_at	Transcript	weakly similar to ( 117)AT4G26970| Symbols: | aconitate hydratase, cytoplasmic, putative / citrate hydro-lyase/aconitase, putative | chr4:13543083-13548433 FORWARDweakly similar to ( 117)ACOC_ORYSA gb|CA686614;	1.43
8.2.11	TCA / org. transformation.other organic acid transformaitons.atp-citrate lyase	taaffx.27287.1.s1_s_at	Transcript	weakly similar to ( 103)AT1G09430| Symbols: ACLA-3 | ACLA-3 (ATP-citrate lyase A-3) | chr1:3042137-3044980 FORWARD gb|CA678789;	1.4
8.3	TCA / org. transformation.carbonic anhydrases	ta.4868.1.s1_x_at	Transcript	weakly similar to ( 157)AT1G08080| Symbols: | carbonic anhydrase family protein | chr1:2517019-2518543 REVERSE gb|CN011015;	2.19
8.3	TCA / org. transformation.carbonic anhydrases	ta.4868.1.s1_a_at	Transcript	weakly similar to ( 157)AT1G08080| Symbols: | carbonic anhydrase family protein | chr1:2517019-2518543 REVERSE gb|CN011015;	1.9
CHO
2.1.1.1	major CHO metabolism.synthesis.sucrose.SPS	taaffx.24586.1.s1_at	Transcript	weakly similar to ( 150)AT1G04920| Symbols: ATSPS3F | ATSPS3F (sucrose phosphate synthase 3F); sucrose-phosphate synthase/ transferase, transferring glycosyl groups | chr1:1391673-1395755 REVERSEweakly similar to ( 154)SPS_SPIOL gb|CA716620;	1.05
2.1.2.2	major CHO metabolism.synthesis.starch.starch synthase	ta.25528.2.s1_at	Transcript	moderately similar to ( 257)AT1G11720| Symbols: ATSS3 | ATSS3 (STARCH SYNTHASE 3); starch synthase/ transferase, transferring glycosyl groups | chr1:3952511-3956840 FORWARDmoderately similar to ( 277)SSY3_SOLTU gb|BJ271418;	1.6
2.1.2.5	major CHO metabolism.synthesis.starch.transporter	taaffx.10989.1.s1_at	Transcript	moderately similar to ( 290)AT4G28390| Symbols: ATAAC3, AAC3 | AAC3 (ADP/ATP CARRIER 3); ATP:ADP antiporter/ binding | chr4:14041492-14042787 REVERSEmoderately similar to ( 291)ADT_ORYSA gb|CK163733;	1.46
2.2.1.1	major CHO metabolism.degradation.sucrose.fructokinase	taaffx.131309.1.s1_at	Transcript	weakly similar to ( 163)AT4G10260| Symbols: | pfkB-type carbohydrate kinase family protein | chr4:6371482-6372766 REVERSEweakly similar to ( 199)SCRK2_ORYSA VAR1 gb|CK207459;	1.35
2.2.1.3.1	major CHO metabolism.degradation.sucrose.invertases.neutral	taaffx.123812.1.s1_s_at	Transcript	weakly similar to ( 170)AT1G72000| Symbols: | beta-fructofuranosidase, putative / invertase, putative / saccharase, putative / beta-fructosidase, putative | chr1:27106939-27109325 FORWARD gb|CA658075;	1.32
3.2.2	minor CHO metabolism.trehalose.TPP	ta.10237.1.s1_at	Transcript	moderately similar to ( 320)AT4G12430| Symbols: | trehalose-6-phosphate phosphatase, putative | chr4:7365477-7367343 REVERSE gb|BJ283883;	1.03
3.5	minor CHO metabolism.others	ta.332.3.a1_a_at	Transcript	moderately similar to ( 253)AT2G37790| Symbols: | aldo/keto reductase family protein | chr2:15845916-15847830 FORWARDweakly similar to ( 149)NADO1_ORYSA gb|BJ230140;	1.42
Lipid_metabolism
11.1.4	lipid metabolism.FA synthesis and FA elongation.ACP oxoacyl reductase	ta.28922.1.s1_at	Transcript	weakly similar to ( 172)AT1G24360| Symbols: | 3-oxoacyl-(acyl-carrier protein) reductase, chloroplast / 3-ketoacyl-acyl carrier protein reductase | chr1:8640809-8643272 FORWARDweakly similar to ( 179)FABG4_BRANA gb|BQ487478;	1.47
11.1.9	lipid metabolism.FA synthesis and FA elongation.long chain fatty acid CoA ligase	taaffx.34682.1.a1_at	Transcript	weakly similar to ( 181)AT3G05970| Symbols: LACS6 | LACS6 (LONG-CHAIN ACYL-COA SYNTHETASE 6) | chr3:1786516-1791752 REVERSE gb|BJ238421;	1.12
11.1.9	lipid metabolism.FA synthesis and FA elongation.long chain fatty acid CoA ligase	taaffx.113953.1.s1_s_at	Transcript	moderately similar to ( 395)AT1G64400| Symbols: | long-chain-fatty-acid--CoA ligase, putative / long-chain acyl-CoA synthetase, putative | chr1:23919465-23923344 REVERSE gb|CD892451;	1.47
11.1.31	lipid metabolism.FA synthesis and FA elongation.pyruvate DH	ta.4210.3.s1_at	Transcript	weakly similar to ( 163)AT2G34590| Symbols: | transketolase family protein | chr2:14576035-14577923 REVERSEweakly similar to ( 116)ODPB_MESVI gb|CA720335;	1.1
11.1.31	lipid metabolism.FA synthesis and FA elongation.pyruvate DH	ta.4210.1.s1_a_at	Transcript	moderately similar to ( 241)AT1G30120| Symbols: PDH-E1 BETA | PDH-E1 BETA (PYRUVATE DEHYDROGENASE E1 BETA); pyruvate dehydrogenase (acetyl-transferring) | chr1:10584334-10586461 REVERSEweakly similar to ( 166)ODPB_MESVI gb|CK207542;	1.08
11.3	lipid metabolism.Phospholipid synthesis	ta.6416.1.s1_at	Transcript	moderately similar to ( 447)AT2G38110| Symbols: ATGPAT6, GPAT6 | ATGPAT6/GPAT6 (GLYCEROL-3-PHOSPHATE ACYLTRANSFERASE 6); 1-acylglycerol-3-phosphate O-acyltransferase/ acyltransferase | chr2:15959894-15962442 REVERSEVAR1 COG5048 gb|CK154083;	1.21
11.3.7	lipid metabolism.Phospholipid synthesis.cyclopropane-fatty-acyl-phospholipid synthase	ta.9664.1.a1_at	Transcript	weakly similar to ( 189)AT3G23510| Symbols: | cyclopropane fatty acid synthase, putative / CPA-FA synthase, putative | chr3:8428078-8433166 FORWARD gb|BQ483035;	2.05
11.3.7	lipid metabolism.Phospholipid synthesis.cyclopropane-fatty-acyl-phospholipid synthase	ta.4726.1.s1_at	Transcript	weakly similar to ( 122)AT3G23510| Symbols: | cyclopropane fatty acid synthase, putative / CPA-FA synthase, putative | chr3:8428078-8433166 FORWARD gb|BJ270709;	1.42
11.3.7	lipid metabolism.Phospholipid synthesis.cyclopropane-fatty-acyl-phospholipid synthase	taaffx.24365.1.s1_at	Transcript	very weakly similar to (96.7)AT3G23530| Symbols: | cyclopropane fatty acid synthase, putative / CPA-FA synthase, putative | chr3:8437479-8442604 FORWARD gb|CA720390;	1.38
11.3.7	lipid metabolism.Phospholipid synthesis.cyclopropane-fatty-acyl-phospholipid synthase	taaffx.92408.1.s1_at	Transcript	moderately similar to ( 463)AT3G23510| Symbols: | cyclopropane fatty acid synthase, putative / CPA-FA synthase, putative | chr3:8428078-8433166 FORWARD gb|CF132877;	1.81
11.6	lipid metabolism.lipid transfer proteins etc	taaffx.130058.1.s1_x_at	Transcript	very weakly similar to (88.6)AT5G59310| Symbols: LTP4 | LTP4 (LIPID TRANSFER PROTEIN 4); lipid binding | chr5:23942522-23942998 REVERSEweakly similar to ( 129)NLTP3_ORYSA gb|AJ611761;	1.7
11.8	lipid metabolism.''exotics'' (steroids, squalene etc)	ta.26323.1.a1_at	Transcript	weakly similar to ( 162)AT5G42890| Symbols: | sterol carrier protein 2 (SCP-2) family protein | chr5:17211686-17213138 REVERSE gb|CD490702;	1.08
11.9.2	lipid metabolism.lipid degradation.lipases	ta.9749.1.a1_at	Transcript	very weakly similar to (88.2)AT2G31100| Symbols: | lipase, putative | chr2:13263815-13265251 REVERSE gb|BJ229752;	1.01
11.9.2.1	lipid metabolism.lipid degradation.lipases.triacylglycerol lipase	ta.9749.3.s1_at	Transcript	very weakly similar to (80.1)AT4G18550| Symbols: | lipase class 3 family protein | chr4:10225017-10226873 REVERSE gb|BJ226041;	1.09
11.9.2.1	lipid metabolism.lipid degradation.lipases.triacylglycerol lipase	ta.7740.2.a1_at	Transcript	moderately similar to ( 209)AT4G18550| Symbols: | lipase class 3 family protein | chr4:10225017-10226873 REVERSEVAR1 COG5048 gb|BJ272793;	1.2
11.9.2.1	lipid metabolism.lipid degradation.lipases.triacylglycerol lipase	ta.7740.1.a1_at	Transcript	weakly similar to ( 192)AT4G18550| Symbols: | lipase class 3 family protein | chr4:10225017-10226873 REVERSEVAR1 COG5048 gb|CK198840;	2.22
11.9.4.9	lipid metabolism.lipid degradation.beta-oxidation.mutifunctional	taaffx.58857.1.s1_at	Transcript	weakly similar to ( 158)AT3G06860| Symbols: ATMPF2, MFP2 | MFP2 (MULTIFUNCTIONAL PROTEIN); enoyl-CoA hydratase | chr3:2161932-2166015 FORWARDweakly similar to ( 159)MFPA_BRANA gb|CA614158;	1.36
11.9.4.9	lipid metabolism.lipid degradation.beta-oxidation.mutifunctional	taaffx.114853.1.s1_at	Transcript	moderately similar to ( 434)AT3G06860| Symbols: ATMPF2, MFP2 | MFP2 (MULTIFUNCTIONAL PROTEIN); enoyl-CoA hydratase | chr3:2161932-2166015 FORWARDmoderately similar to ( 448)MFPA_CUCSA gb|BJ291348;	1.85
11.10.3	lipid metabolism.glycolipid synthesis.UDP-sulfoquinovose synthase	taaffx.65883.1.s1_at	Transcript	moderately similar to ( 333)AT4G33030| Symbols: SQD1 | SQD1 (sulfoquinovosyldiacylglycerol 1); UDPsulfoquinovose synthase | chr4:15936054-15937569 FORWARDmoderately similar to ( 329)SQD1_SPIOL gb|CA723891;	1.22
Co-factors and vitamins
18	Co-factor and vitamine metabolism	ta.27416.1.s1_at	Transcript	moderately similar to ( 244)AT5G48840| Symbols: PANC | PANC (Arabidopsis homolog of bacterial panC); pantoate-beta-alanine ligase | chr5:19821049-19822267 REVERSEmoderately similar to ( 298)PANC_ORYSA gb|BT009390.1;	1.34
18	Co-factor and vitamine metabolism	ta.4802.1.s1_a_at	Transcript	moderately similar to ( 400)AT5G64300| Symbols: ATGCH | ATGCH (ARABIDOPSIS THALIANA GTP CYCLOHYDROLASE II); 3,4-dihydroxy-2-butanone-4-phosphate synthase/ GTP cyclohydrolase II | chr5:25735685-25738016 FORWARD gb|CD897720;	1.1
18.3.1	Co-factor and vitamine metabolism.riboflavin.GTP cyclohydrolase II	ta.4802.1.s1_a_at	Transcript	moderately similar to ( 400)AT5G64300| Symbols: ATGCH | ATGCH (ARABIDOPSIS THALIANA GTP CYCLOHYDROLASE II); 3,4-dihydroxy-2-butanone-4-phosphate synthase/ GTP cyclohydrolase II | chr5:25735685-25738016 FORWARD gb|CD897720;	1.1
Nucleotides
23.1.2.5	nucleotide metabolism.synthesis.purine.AIR synthase	ta.2335.2.a1_at	Transcript	weakly similar to ( 153)AT3G55010| Symbols: ATPURM, PUR5 | ATPURM/PUR5; phosphoribosylformylglycinamidine cyclo-ligase | chr3:20397795-20399526 FORWARDweakly similar to ( 157)PUR5_VIGUN gb|CA722075;	1.7
23.4.10	nucleotide metabolism.phosphotransfer and pyrophosphatases.nucleoside diphosphate kinase	ta.2227.1.s1_a_at	Transcript	weakly similar to ( 141)AT4G09320| Symbols: NDPK1 | NDPK1 (nucleoside diphosphate kinase 1); ATP binding / nucleoside diphosphate kinase | chr4:5923421-5924363 FORWARDweakly similar to ( 151)NDK1_SACOF gb|CK203324;	1.4

## Sheet: Secondary_metab
BinCode	BinName	id	type	description	log2FC
16.1.2.3	secondary metabolism.isoprenoids.mevalonate pathway.HMG-CoA reductase	taaffx.128629.2.a1_at	Transcript	gb|CD490347;	1.04
16.1.3.4	secondary metabolism.isoprenoids.tocopherol biosynthesis.tocopherol cyclase	ta.21337.2.s1_a_at	Transcript	weakly similar to ( 150)AT4G32770| Symbols: ATSDX1, VTE1 | VTE1 (VITAMIN E DEFICIENT 1) | chr4:15804986-15807795 FORWARDweakly similar to ( 179)TOCC_MAIZE gb|CA730576;	1.01
16.2	secondary metabolism.phenylpropanoids	ta.19357.1.s1_at	Transcript	weakly similar to ( 125)ZRP4_MAIZE gb|CB307103;	1.59
16.2	secondary metabolism.phenylpropanoids	ta.5399.1.s1_a_at	Transcript	weakly similar to ( 135)ZRP4_MAIZECOG5048 gb|CK198328;	2.48
16.2.1.9	secondary metabolism.phenylpropanoids.lignin biosynthesis.COMT	ta.25295.1.s1_at	Transcript	moderately similar to ( 300)AT5G54160| Symbols: OMT1, ATOMT1 | ATOMT1 (O-METHYLTRANSFERASE 1) | chr5:21999301-22001393 FORWARDmoderately similar to ( 370)COMT1_MAIZE gb|CD373447;	2.64
16.4.2	secondary metabolism.N misc.betaine	ta.25596.2.s1_at	Transcript	moderately similar to ( 391)AT3G24503| Symbols: ALDH1A, REF1, ALDH2C4 | ALDH2C4 (REDUCED EPIDERMAL FLUORESCENCE1); 3-chloroallyl aldehyde dehydrogenase/ aldehyde dehydrogenase (NAD) | chr3:8919739-8923036 REVERSEweakly similar to ( 189)BADH_SPIOL gb|BQ788785;	1.14
16.7	secondary metabolism.wax	ta.6603.2.s1_x_at	Transcript	moderately similar to ( 398)AT1G02205| Symbols: CER1 | CER1 (ECERIFERUM 1) | chr1:418818-422154 FORWARDVAR1 gb|CK207205;	1.5
16.7	secondary metabolism.wax	ta.6603.3.s1_a_at	Transcript	weakly similar to ( 130)AT2G37700| Symbols: | similar to CER1 protein, putative [Arabidopsis thaliana] (TAIR:AT1G02190.1); similar to unnamed protein product [Vitis vinifera] (GB:CAO17291.1); contains InterPro domain Sterol desaturase; (InterPro:IPR006088) | chr2:15818719-15821254 REVERSE gb|BJ209206;	1.43
16.8.3	secondary metabolism.flavonoids.dihydroflavonols	ta.14243.1.a1_at	Transcript	weakly similar to ( 130)AT3G51240| Symbols: TT6, F3'H, F3H | F3H (TRANSPARENT TESTA 6); naringenin 3-dioxygenase | chr3:19036388-19037637 FORWARDweakly similar to ( 164)FL3H_HORVU gb|BQ838987;	-1.02
16.10	secondary metabolism.simple phenols	taaffx.121266.1.s1_s_at	Transcript	weakly similar to ( 120)AT3G09220| Symbols: LAC7 | LAC7 (laccase 7); copper ion binding / oxidoreductase | chr3:2827440-2830483 REVERSE gb|BG906019;	1.03

## Sheet: Hormone_metab
BinCode	BinName	id	type	description	log2FC
17.1.2	hormone metabolism.abscisic acid.signal transduction	ta.42.1.s1_at	Transcript	weakly similar to ( 195)AT3G24650| Symbols: ABI3 | ABI3 (ABA INSENSITIVE 3); DNA binding / transcription activator/ transcription factor | chr3:8997918-9000787 FORWARDmoderately similar to ( 337)VIV_ORYSA VAR1 COG5048 COG4886 MopB_Res-Cmplx1_Nad11-M Merozoite_SPAM COG5099 gb|AB047554.1;	1.28
17.2.2	hormone metabolism.auxin.signal transduction	ta.7558.3.s1_a_at	Transcript	moderately similar to ( 251)AT2G32410| Symbols: AXL | AXL (AXR1-LIKE); catalytic | chr2:13764779-13767361 FORWARD gb|BQ609768;	1.24
17.3.1.2.3	hormone metabolism.brassinosteroid.synthesis-degradation.sterols.CYP51	taaffx.107507.1.s1_at	Transcript	very weakly similar to (87.4)AT1G11680| Symbols: EMB1738, CYP51A2, CYP51, CYP51G1 | CYP51G1 (CYTOCHROME P450 51); oxygen binding | chr1:3938925-3940585 FORWARDvery weakly similar to (90.1)CP51_SORBI gb|CA690543;	-1.13
17.3.1.2.3	hormone metabolism.brassinosteroid.synthesis-degradation.sterols.CYP51	ta.8390.1.s1_at	Transcript	weakly similar to ( 119)AT1G11680| Symbols: EMB1738, CYP51A2, CYP51, CYP51G1 | CYP51G1 (CYTOCHROME P450 51); oxygen binding | chr1:3938925-3940585 FORWARDweakly similar to ( 125)CP51_SORBI gb|BQ161830;	-1.07
17.3.1.2.3	hormone metabolism.brassinosteroid.synthesis-degradation.sterols.CYP51	taaffx.28047.1.s1_at	Transcript	very weakly similar to (97.4)AT1G11680| Symbols: EMB1738, CYP51A2, CYP51, CYP51G1 | CYP51G1 (CYTOCHROME P450 51); oxygen binding | chr1:3938925-3940585 FORWARDvery weakly similar to (95.1)CP51_SORBI gb|CA665990;	-2.32
17.3.1.2.3	hormone metabolism.brassinosteroid.synthesis-degradation.sterols.CYP51	taaffx.107979.1.s1_at	Transcript	weakly similar to ( 141)AT1G11680| Symbols: EMB1738, CYP51A2, CYP51, CYP51G1 | CYP51G1 (CYTOCHROME P450 51); oxygen binding | chr1:3938925-3940585 FORWARDweakly similar to ( 141)CP51_WHEAT gb|CA692409;	-1.16
17.5.1	hormone metabolism.ethylene.synthesis-degradation	ta.11292.1.a1_at	Transcript	weakly similar to ( 194)AT5G59530| Symbols: | 2-oxoglutarate-dependent dioxygenase, putative | chr5:24011660-24012941 REVERSEweakly similar to ( 189)DV4H_CATRO gb|CA646718;	1.04
17.5.1	hormone metabolism.ethylene.synthesis-degradation	ta.28233.1.s1_at	Transcript	moderately similar to ( 217)AT5G20400| Symbols: | oxidoreductase, 2OG-Fe(II) oxygenase family protein | chr5:6894873-6896187 FORWARDweakly similar to ( 153)FLS_SOLTU gb|CA599187;	-1.18
17.6.3	hormone metabolism.gibberelin.induced-regulated-responsive-activated	ta.3576.1.s1_at	Transcript	very weakly similar to (83.6)AT4G09610| Symbols: GASA2 | GASA2 (GAST1 PROTEIN HOMOLOG 2) | chr4:6074924-6075570 REVERSE gb|AJ611561;	1.22
17.6.3	hormone metabolism.gibberelin.induced-regulated-responsive-activated	ta.338.1.s1_at	Transcript	weakly similar to ( 120)AT3G10185| Symbols: | Encodes a Gibberellin-regulated GASA/GAST/Snakin family protein | chr3:3145584-3146204 FORWARD gb|BF484849;	1.5
17.7.1.2	hormone metabolism.jasmonate.synthesis-degradation.lipoxygenase	taaffx.78768.1.s1_at	Transcript	very weakly similar to (84.7)LOX6_ORYSA gb|CA727586;	1.01

## Sheet: Photosynthesis
BinCode	BinName	id	type	description	log2FC
1.1.2.2	PS.lightreaction.photosystem I.PSI polypeptide subunits	taaffx.12631.1.s1_at	Transcript	moderately similar to ( 337)ATCG00340| Symbols: PSAB | Encodes the D1 subunit of photosystem I and II reaction centers. | chrC:37375-39579 REVERSEmoderately similar to ( 351)PSAB_WHEAT gb|BJ248421;	2.01
1.1.4	PS.lightreaction.ATP synthase	ta.9647.2.s1_at	Transcript	highly similar to ( 577)AT4G38510| Symbols: | (VACUOLAR ATP SYNTHASE SUBUNIT B2); hydrogen ion transporting ATP synthase, rotational mechanism | chr4:18011149-18014783 REVERSEhighly similar to ( 579)VATB1_GOSHIVAR1 gb|CK161429;	1
1.1.40	PS.lightreaction.cyclic electron flow-chlororespiration	taaffx.128617.1.s1_x_at	Transcript	weakly similar to ( 195)ATCG01010| Symbols: NDHF | Chloroplast encoded NADH dehydrogenase unit. | chrC:110398-112638 REVERSEmoderately similar to ( 204)NU5C_LACSA gb|CA670913;	1.06
1.3.1	PS.calvin cyle.rubisco large subunit	taaffx.128414.215.s1_s_at	Transcript	very weakly similar to (90.1)ATCG00490| Symbols: RBCL | large subunit of RUBISCO. | chrC:54958-56397 FORWARDvery weakly similar to (95.1)RBL_WHEAT gb|CA736893;	1.27
1.3.1	PS.calvin cyle.rubisco large subunit	taaffx.128414.24.a1_s_at	Transcript	weakly similar to ( 116)ATCG00490| Symbols: RBCL | large subunit of RUBISCO. | chrC:54958-56397 FORWARDweakly similar to ( 115)RBL_SPIOL gb|CA722241;	-1.24
1.3.1	PS.calvin cyle.rubisco large subunit	taaffx.128414.6.s1_at	Transcript	moderately similar to ( 233)ATCG00490| Symbols: RBCL | large subunit of RUBISCO. | chrC:54958-56397 FORWARDmoderately similar to ( 254)RBL_WHEAT gb|CA736722;	-1.12
1.3.8	PS.calvin cyle.transketolase	taaffx.78956.1.s1_at	Transcript	very weakly similar to ( 100)AT3G60750| Symbols: | transketolase, putative | chr3:22464979-22467799 FORWARDweakly similar to ( 103)TKTC_MAIZE gb|CA724299;	1.01

## Sheet: Cell_wall
BinCode	BinName	id	type	description	log2FC
10.6.1	cell wall.degradation.cellulases and beta -1,4-glucanases	taaffx.7177.1.s1_x_at	Transcript	weakly similar to ( 168)AT5G20950| Symbols: | glycosyl hydrolase family 3 protein | chr5:7107611-7110777 REVERSE gb|CA694274;	1.05
10.6.1	cell wall.degradation.cellulases and beta -1,4-glucanases	taaffx.7177.1.s1_s_at	Transcript	weakly similar to ( 168)AT5G20950| Symbols: | glycosyl hydrolase family 3 protein | chr5:7107611-7110777 REVERSE gb|CA694274;	1.39
10.6.3	cell wall.degradation.pectate lyases and polygalacturonases	ta.14588.3.s1_x_at	Transcript	weakly similar to ( 107)PGIP1_ORYSA gb|CA718384;	1.29
10.6.3	cell wall.degradation.pectate lyases and polygalacturonases	ta.14588.2.s1_x_at	Transcript	weakly similar to ( 142)AT5G06860| Symbols: PGIP1 | PGIP1 (POLYGALACTURONASE INHIBITING PROTEIN 1); protein binding | chr5:2132374-2133435 FORWARDmoderately similar to ( 310)PGIP1_ORYSA gb|CD930954;	1.21
10.7	cell wall.modification	taaffx.17141.1.s1_at	Transcript	moderately similar to ( 318)AT4G03210| Symbols: XTH9 | XTH9 (XYLOGLUCAN ENDOTRANSGLUCOSYLASE/HYDROLASE 9); hydrolase, acting on glycosyl bonds | chr4:1416107-1417197 FORWARDmoderately similar to ( 264)XTHA_PHAAN gb|CD866709;	1
10.7	cell wall.modification	ta.20221.1.s1_at	Transcript	very weakly similar to (83.6)AT1G20190| Symbols: EXP11, ATEXP11, ATHEXP ALPHA 1.14, ATEXPA11 | ATEXPA11 (ARABIDOPSIS THALIANA EXPANSIN A11) | chr1:6998753-6999701 REVERSEweakly similar to ( 102)EXPA1_ORYSA gb|CA637685;	2.61

## Sheet: Mitoch_transport
BinCode	BinName	id	type	description	log2FC
9.1.2	mitochondrial electron transport / ATP synthesis.NADH-DH.localisation not clear	ta.13389.1.s1_at	Transcript	moderately similar to ( 264)AT5G11770| Symbols: | NADH-ubiquinone oxidoreductase 20 kDa subunit, mitochondrial | chr5:3791149-3792930 REVERSEmoderately similar to ( 266)NDUS7_BRAOL gb|BQ579337;	1.06

## Sheet: Metal_handling
BinCode	BinName	id	type	description	log2FC
15.2	metal handling.binding, chelation and storage	ta.5549.3.s1_at	Transcript	weakly similar to ( 146)NAS1_HORVU gb|CD878292;	-1.27

## Sheet: Biodegradation_xenob
BinCode	BinName	id	type	description	log2FC
24.2	Biodegradation of Xenobiotics.lactoylglutathione lyase	ta.20582.1.s1_x_at	Transcript	weakly similar to ( 164)AT1G07645| Symbols: | lactoylglutathione lyase family protein / glyoxalase I family protein | chr1:2367609-2368346 REVERSE gb|BJ296527;	1.42
24.2	Biodegradation of Xenobiotics.lactoylglutathione lyase	ta.20582.1.s1_a_at	Transcript	weakly similar to ( 164)AT1G07645| Symbols: | lactoylglutathione lyase family protein / glyoxalase I family protein | chr1:2367609-2368346 REVERSE gb|BJ296527;	1.18

## Sheet: Stress
BinCode	BinName	id	type	description	log2FC
Biotic
20.1	stress.biotic	taaffx.108556.1.s1_at	Transcript	gb|CA692789;	-1.42
20.1	stress.biotic	ta.23322.2.s1_at	Transcript	weakly similar to ( 190)AT4G11650| Symbols: ATOSM34 | ATOSM34 (OSMOTIN 34) | chr4:7025121-7026107 REVERSEmoderately similar to ( 220)ZEAM_MAIZE gb|CA640491;	-1.42
20.1	stress.biotic	taaffx.108908.1.s1_x_at	Transcript	moderately similar to ( 203)AT4G11650| Symbols: ATOSM34 | ATOSM34 (OSMOTIN 34) | chr4:7025121-7026107 REVERSEmoderately similar to ( 245)ZEAM_MAIZE gb|CA684616;	-1.25
20.1	stress.biotic	ta.13256.1.a1_x_at	Transcript	very weakly similar to (99.8)AT1G18250| Symbols: ATLP-1 | ATLP-1 (Arabidopsis thaumatin-like protein 1) | chr1:6277017-6277998 REVERSEvery weakly similar to (82.4)TP1A_MALDO gb|CD454115;	1.04
20.1	stress.biotic	ta.21556.1.s1_at	Transcript	weakly similar to ( 101)WIR1B_WHEAT gb|CA684533;	-1.1
20.1	stress.biotic	ta.13256.2.s1_x_at	Transcript	weakly similar to ( 167)AT1G18250| Symbols: ATLP-1 | ATLP-1 (Arabidopsis thaumatin-like protein 1) | chr1:6277017-6277998 REVERSEweakly similar to ( 136)TP1A_MALDOVAR1 gb|CK193207;	1.07
20.1	stress.biotic	ta.13256.1.a1_a_at	Transcript	very weakly similar to (99.8)AT1G18250| Symbols: ATLP-1 | ATLP-1 (Arabidopsis thaumatin-like protein 1) | chr1:6277017-6277998 REVERSEvery weakly similar to (82.4)TP1A_MALDO gb|CD454115;	1.12
20.1	stress.biotic	ta.21556.1.s1_x_at	Transcript	weakly similar to ( 101)WIR1B_WHEAT gb|CA684533;	-1.04
20.1	stress.biotic	ta.13256.2.s1_at	Transcript	weakly similar to ( 167)AT1G18250| Symbols: ATLP-1 | ATLP-1 (Arabidopsis thaumatin-like protein 1) | chr1:6277017-6277998 REVERSEweakly similar to ( 136)TP1A_MALDOVAR1 gb|CK193207;	1.21
20.1.1	stress.biotic.respiratory burst	ta.7051.1.a1_at	Transcript	weakly similar to ( 124)AT1G64060| Symbols: ATRBOHF, RBOHAP108, RBOHF, ATRBOH F | ATRBOH F (RESPIRATORY BURST OXIDASE PROTEIN F); NAD(P)H oxidase | chr1:23773929-23779980 FORWARD gb|CK159915;	1.06
Abiotic
20.2.1	stress.abiotic.heat	ta.9115.1.s1_at	Transcript	moderately similar to ( 321)AT5G15450| Symbols: APG6, CLPB3, CLPB-P | APG6/CLPB-P/CLPB3 (ALBINO AND PALE GREEN 6); ATP binding / ATPase | chr5:5014402-5018258 REVERSEmoderately similar to ( 234)HS101_ORYSA gb|CD899939;	1.06
20.2.1	stress.abiotic.heat	taaffx.118169.1.s1_at	Transcript	weakly similar to ( 159)AT2G35720| Symbols: | DNAJ heat shock N-terminal domain-containing protein | chr2:15023962-15026945 FORWARD gb|BJ292465;	1.08
20.2.1	stress.abiotic.heat	ta.6123.2.s1_at	Transcript	weakly similar to ( 191)AT2G32120| Symbols: HSP70T-2 | HSP70T-2; ATP binding | chr2:13658797-13660488 REVERSEvery weakly similar to (89.7)HSP7C_PETHY gb|BJ290998;	1.12
20.2.1	stress.abiotic.heat	ta.21910.2.s1_at	Transcript	very weakly similar to (90.5)AT5G59720| Symbols: | HSP18.2 (HEAT SHOCK PROTEIN 18.2) | chr5:24079858-24080343 FORWARDvery weakly similar to (83.2)HSP12_MEDSA gb|CA708152;	-1.44
20.2.1	stress.abiotic.heat	taaffx.87645.1.s1_at	Transcript	highly similar to ( 687)AT2G26890| Symbols: KAM2, GRV2 | GRV2 (KATAMARI2); binding / heat shock protein binding | chr2:11469405-11479337 REVERSE gb|CA731589;	1.17
20.2.1	stress.abiotic.heat	ta.11680.1.s1_at	Transcript	very weakly similar to (81.3)AT5G09590| Symbols: HSC70-5, mtHSC70-2 | mtHSC70-2 (HEAT SHOCK PROTEIN 70); ATP binding / unfolded protein binding | chr5:2975722-2978509 FORWARDvery weakly similar to (81.6)HSP7M_PHAVU gb|BQ170583;	1.29
20.2.1	stress.abiotic.heat	ta.21335.1.s1_a_at	Transcript	highly similar to ( 885)AT5G28540| Symbols: BIP1 | BIP1; ATP binding | chr5:10540669-10543278 REVERSEhighly similar to ( 901)BIP3_MAIZEVAR1 gb|BJ321089;	1.24
20.2.1	stress.abiotic.heat	taaffx.120096.1.s1_at	Transcript	moderately similar to ( 216)AT1G79940| Symbols: | heat shock protein binding / unfolded protein binding | chr1:30074916-30078130 FORWARD gb|CD875509;	1.19
20.2.1	stress.abiotic.heat	taaffx.107458.1.s1_s_at	Transcript	very weakly similar to (93.6)AT5G28540| Symbols: BIP1 | BIP1; ATP binding | chr5:10540669-10543278 REVERSEvery weakly similar to (92.8)BIP5_TOBAC gb|CA699507;	1.25
20.2.2	stress.abiotic.cold	taaffx.128796.1.s1_at	Transcript	weakly similar to ( 157)AT3G17020| Symbols: | universal stress protein (USP) family protein | chr3:5802734-5804069 REVERSE gb|CK196726;	-1.12
20.2.3	stress.abiotic.drought/salt	taaffx.113733.1.s1_at	Transcript	weakly similar to ( 120)AT1G30360| Symbols: ERD4 | ERD4 (EARLY-RESPONSIVE TO DEHYDRATION 4) | chr1:10715874-10718781 FORWARD gb|CA606156;	1.89
20.2.3	stress.abiotic.drought/salt	ta.6973.2.s1_at	Transcript	weakly similar to ( 191)AT4G02900| Symbols: | early-responsive to dehydration protein-related / ERD protein-related | chr4:1284066-1287747 FORWARD gb|BJ313299;	1.31
20.2.99	stress.abiotic.unspecified	ta.21085.1.s1_x_at	Transcript	weakly similar to ( 166)AT1G02335| Symbols: GL22 | GL22 (GERMIN-LIKE PROTEIN SUBFAMILY 2 MEMBER 2 PRECURSOR.); manganese ion binding / metal ion binding / nutrient reservoir | chr1:463979-464876 REVERSEweakly similar to ( 159)RHRE_PEA gb|CA645233;	1.01
20.2.99	stress.abiotic.unspecified	ta.22673.1.s1_s_at	Transcript	moderately similar to ( 208)AT1G18980| Symbols: | germin-like protein, putative | chr1:6557355-6558017 REVERSEmoderately similar to ( 422)GER2_WHEAT gb|M21962.1;	-1.98
20.2.99	stress.abiotic.unspecified	ta.21085.1.s1_at	Transcript	weakly similar to ( 166)AT1G02335| Symbols: GL22 | GL22 (GERMIN-LIKE PROTEIN SUBFAMILY 2 MEMBER 2 PRECURSOR.); manganese ion binding / metal ion binding / nutrient reservoir | chr1:463979-464876 REVERSEweakly similar to ( 159)RHRE_PEA gb|CA645233;	1.74

## Sheet: Cell
BinCode	BinName	id	type	description	log2FC
Cell_Organization
31.1	cell.organisation	ta.14590.3.s1_at	Transcript	weakly similar to ( 129)AT5G10230| Symbols: ANNAT7, ANN7 | ANN7/ANNAT7 (ANNEXIN ARABIDOPSIS 7); calcium ion binding / calcium-dependent phospholipid binding | chr5:3209739-3211397 REVERSEweakly similar to ( 123)ANX4_FRAAN gb|CK196800;	1.29
31.1	cell.organisation	ta.5352.2.s1_at	Transcript	moderately similar to ( 335)AT2G35630| Symbols: GEM1, MOR1 | MOR1 (MICROTUBULE ORGANIZATION 1) | chr2:14973907-14987440 FORWARD gb|CK208861;	1.34
31.1	cell.organisation	ta.23457.2.s1_at	Transcript	moderately similar to ( 271)AT3G19960| Symbols: ATM1 | ATATM (myosin 1); motor | chr3:6949793-6956742 FORWARD gb|CA660982;	1.12
31.2	cell.division	ta.2441.1.s1_at	Transcript	moderately similar to ( 309)AT5G63860| Symbols: UVR8 | UVR8 (UVB-RESISTANCE 8) | chr5:25572047-25575813 REVERSEVAR1 COG5048 COG5099 gb|CD452394;	1.07
31.4	cell.vesicle transport	ta.27318.1.s1_at	Transcript	highly similar to ( 695)AT4G11380| Symbols: | beta-adaptin, putative | chr4:6920603-6925439 FORWARDVAR1 COG5048 PRK08581 gb|BG908329;	1.12
31.4	cell.vesicle transport	ta.29355.1.s1_at	Transcript	highly similar to ( 807)AT4G34450| Symbols: | coatomer gamma-2 subunit, putative / gamma-2 coat protein, putative / gamma-2 COP, putative | chr4:16471960-16476799 FORWARD gb|CA663837;	1.4
31.4	cell.vesicle transport	taaffx.31774.1.s1_at	Transcript	weakly similar to ( 140)AT3G15980| Symbols: | coatomer protein complex, subunit beta 2 (beta prime), putative | chr3:5412021-5418319 REVERSE gb|CA607903;	1.42
31.4	cell.vesicle transport	ta.10236.1.a1_at	Transcript	very weakly similar to (85.1)AT2G45140| Symbols: | vesicle-associated membrane protein, putative / VAMP, putative | chr2:18618104-18620046 FORWARD gb|CK205521;	1.3
31.4	cell.vesicle transport	taaffx.31774.1.s1_x_at	Transcript	weakly similar to ( 140)AT3G15980| Symbols: | coatomer protein complex, subunit beta 2 (beta prime), putative | chr3:5412021-5418319 REVERSE gb|CA607903;	1.15
31.4	cell.vesicle transport	ta.6441.2.s1_at	Transcript	moderately similar to ( 425)AT3G16270| Symbols: | binding | chr3:5513707-5516546 FORWARD gb|CD492016;	1.3
31.4	cell.vesicle transport	ta.7311.3.s1_a_at	Transcript	weakly similar to ( 135)AT3G60600| Symbols: VAP, (AT)VAP, VAP27, VAP27-1 | VAP27-1 (VAMP/SYNAPTOBREVIN-ASSOCIATED PROTEIN 27-1) | chr3:22411512-22412644 FORWARD gb|CA639744;	1.16
31.4	cell.vesicle transport	taaffx.121446.3.s1_s_at	Transcript	weakly similar to ( 155)AT1G12360| Symbols: KEU | KEU (KEULE); protein transporter | chr1:4201170-4206142 FORWARDweakly similar to ( 170)SEC1A_ORYSA gb|CA692988;	1.64
31.4	cell.vesicle transport	ta.6942.2.s1_at	Transcript	highly similar to ( 731)AT1G52360| Symbols: | coatomer protein complex, subunit beta 2 (beta prime), putative | chr1:19502951-19509066 FORWARD gb|BJ226072;	1.09
31.4	cell.vesicle transport	ta.23734.3.s1_a_at	Transcript	very weakly similar to (97.4)AT4G31480| Symbols: | coatomer beta subunit, putative / beta-coat protein, putative / beta-COP, putative | chr4:15264082-15267390 FORWARD gb|CA605815;	1.01
31.4	cell.vesicle transport	taaffx.56430.1.s1_at	Transcript	weakly similar to ( 110)AT4G34450| Symbols: | coatomer gamma-2 subunit, putative / gamma-2 coat protein, putative / gamma-2 COP, putative | chr4:16471960-16476799 FORWARD gb|CA651828;	1.2
Cell_transport
34.1.1	transport.p- and v-ATPases.H+-transporting two-sector ATPase	ta.1819.3.s1_x_at	Transcript	moderately similar to ( 426)AT4G38510| Symbols: | (VACUOLAR ATP SYNTHASE SUBUNIT B2); hydrogen ion transporting ATP synthase, rotational mechanism | chr4:18011149-18014783 REVERSEmoderately similar to ( 448)VATB1_HORVU gb|CA614241;	1.31
34.1.1	transport.p- and v-ATPases.H+-transporting two-sector ATPase	ta.9647.2.s1_at	Transcript	highly similar to ( 577)AT4G38510| Symbols: | (VACUOLAR ATP SYNTHASE SUBUNIT B2); hydrogen ion transporting ATP synthase, rotational mechanism | chr4:18011149-18014783 REVERSEhighly similar to ( 579)VATB1_GOSHIVAR1 gb|CK161429;	1
34.10	transport.nucleotides	ta.20676.2.s1_a_at	Transcript	very weakly similar to (89.0)AT4G09640| Symbols: | similar to permease-related [Arabidopsis thaliana] (TAIR:AT1G34470.1); similar to hypothetical protein [Vitis vinifera] (GB:CAN81783.1); contains InterPro domain Protein of unknown function DUF803 (InterPro:IPR008521) | chr4:6088430-6090601 REVERSE gb|CA593533;	1.34
34.12	transport.metal	taaffx.78135.1.s1_at	Transcript	moderately similar to ( 262)AT5G44790| Symbols: HMA7, RAN1 | RAN1 (RESPONSIVE-TO-ANTAGONIST1); ATPase, coupled to transmembrane movement of ions, phosphorylative mechanism | chr5:18093073-18097044 REVERSE gb|CA737093;	1.08
34.13	transport.peptides and oligopeptides	ta.5210.2.s1_a_at	Transcript	moderately similar to ( 260)AT2G02040| Symbols: PTR2-B, NTR1, ATPTR2-B | ATPTR2-B (NITRATE TRANSPORTER 1); transporter | chr2:487541-489706 FORWARD gb|BQ168369;	-1.27
34.15	transport.potassium	taaffx.23645.1.s1_at	Transcript	moderately similar to ( 310)AT1G70300| Symbols: KUP6 | KUP6 (K+ uptake permease 6); potassium ion transmembrane transporter | chr1:26481656-26484896 REVERSEmoderately similar to ( 306)HAK10_ORYSA gb|CA732401;	1.02
34.16	transport.ABC transporters and multidrug resistance systems	ta.847.1.s1_x_at	Transcript	moderately similar to ( 389)AT1G02520| Symbols: PGP11 | PGP11 (P-GLYCOPROTEIN 11); ATPase, coupled to transmembrane movement of substances | chr1:524134-528745 FORWARDmoderately similar to ( 285)MDR_ORYSA gb|BQ168917;	-1.09
34.16	transport.ABC transporters and multidrug resistance systems	taaffx.101420.1.s1_at	Transcript	moderately similar to ( 301)AT2G26910| Symbols: PDR4, ATPDR4 | ATPDR4/PDR4 (PLEIOTROPIC DRUG RESISTANCE 4); ATPase, coupled to transmembrane movement of substances | chr2:11488701-11494952 FORWARDmoderately similar to ( 342)PDR6_ORYSA gb|CA599581;	1.79
34.16	transport.ABC transporters and multidrug resistance systems	taaffx.101420.2.s1_at	Transcript	moderately similar to ( 265)AT2G26910| Symbols: PDR4, ATPDR4 | ATPDR4/PDR4 (PLEIOTROPIC DRUG RESISTANCE 4); ATPase, coupled to transmembrane movement of substances | chr2:11488701-11494952 FORWARDmoderately similar to ( 304)PDR6_ORYSA gb|CA596873;	1
34.16	transport.ABC transporters and multidrug resistance systems	ta.505.1.a1_at	Transcript	moderately similar to ( 305)AT1G79600| Symbols: | ABC1 family protein | chr1:29954998-29957409 REVERSE gb|CA737906;	1.66
34.21	transport.calcium	ta.3864.2.s1_a_at	Transcript	weakly similar to ( 179)AT3G51860| Symbols: ATHCX1, CAX1-LIKE, ATCAX3, CAX3 | CAX3 (cation exchanger 3); cation:cation antiporter | chr3:19250435-19253496 FORWARDmoderately similar to ( 227)CAX1A_ORYSA gb|CA733260;	1.39
34.21	transport.calcium	taaffx.96904.1.s1_at	Transcript	weakly similar to ( 191)AT1G55730| Symbols: CAX5, ATCAX5 | ATCAX5 (calcium exchanger 5); cation:cation antiporter | chr1:20835053-20837607 REVERSEmoderately similar to ( 246)CAX2_ORYSA gb|BJ268172;	1.04
34.22	transport.cyclic nucleotide or calcium regulated channels	taaffx.5318.1.s1_at	Transcript	weakly similar to ( 113)AT5G15410| Symbols: ATCNGC2, CNGC2, DND1 | DND1 (DEFENSE NO DEATH 1); calcium channel/ calmodulin binding / cation channel/ cyclic nucleotide binding / inward rectifier potassium channel | chr5:5003463-5006766 REVERSE gb|CA715081;	1.07
34.99	transport.misc	ta.4103.1.a1_at	Transcript	weakly similar to ( 160)AT3G08040| Symbols: MAN1, FRD3 | FRD3 (FERRIC REDUCTASE DEFECTIVE 3); antiporter | chr3:2566599-2569403 REVERSE gb|BQ169536;	1.15
34.99	transport.misc	ta.28555.1.s1_at	Transcript	weakly similar to ( 167)AT1G04560| Symbols: | AWPM-19-like membrane family protein | chr1:1245069-1245887 FORWARD gb|BQ166465;	2.26
34.99	transport.misc	ta.4920.1.s1_at	Transcript	weakly similar to ( 183)AT3G13050| Symbols: | transporter-related | chr3:4176873-4178875 FORWARD gb|BJ268955;	1.13
34.99	transport.misc	taaffx.114210.2.s1_at	Transcript	weakly similar to ( 149)AT5G46150| Symbols: | LEM3 (ligand-effect modulator 3) family protein / CDC50 family protein | chr5:18725962-18727651 REVERSE gb|CA596768;	1.52
34.99	transport.misc	ta.22618.1.s1_a_at	Transcript	weakly similar to ( 129)AT1G32050| Symbols: | secretory carrier membrane protein (SCAMP) family protein | chr1:11528596-11530954 FORWARD gb|CK212493;	-1
34.99	transport.misc	ta.28555.3.s1_x_at	Transcript	moderately similar to ( 205)AT1G04560| Symbols: | AWPM-19-like membrane family protein | chr1:1245069-1245887 FORWARD gb|CD904599;	1.07
34.99	transport.misc	ta.4103.2.s1_at	Transcript	weakly similar to ( 107)AT1G51340| Symbols: | MATE efflux family protein | chr1:19035702-19038349 FORWARD gb|BJ258950;	1.23
34.99	transport.misc	ta.14259.1.s1_at	Transcript	weakly similar to ( 185)AT1G04560| Symbols: | AWPM-19-like membrane family protein | chr1:1245069-1245887 FORWARD gb|BJ300061;	2.35
Cell_development
33.1	development.storage proteins	ta.30754.1.s1_at	Transcript	weakly similar to ( 196)AT2G28490| Symbols: | cupin family protein | chr2:12185889-12188060 REVERSE gb|BJ295650;	1.51
33.2	development.late embryogenesis abundant	ta.6019.1.s1_at	Transcript	gb|BE517508;	3.93
33.2	development.late embryogenesis abundant	ta.5913.1.s1_at	Transcript	weakly similar to ( 139)AT3G15670| Symbols: | late embryogenesis abundant protein, putative / LEA protein, putative | chr3:5310148-5310908 REVERSEweakly similar to ( 194)LEA1_HORVU gb|CD924673;	1.19
33.2	development.late embryogenesis abundant	ta.23659.1.s1_at	Transcript	very weakly similar to ( 100)AT1G52690| Symbols: | late embryogenesis abundant protein, putative / LEA protein, putative | chr1:19623510-19624257 FORWARDweakly similar to ( 180)LEA1_HORVU gb|AY148491.1;	1.52
33.2	development.late embryogenesis abundant	ta.5888.1.s1_s_at	Transcript	gb|BQ807116;	1.69
33.99	development.unspecified	ta.25342.1.s1_at	Transcript	weakly similar to ( 108)AT2G42840| Symbols: PDF1 | PDF1 (PROTODERMAL FACTOR 1) | chr2:17833404-17834503 REVERSECOG3883 gb|BQ170230;	1.07
33.99	development.unspecified	ta.21394.1.s1_at	Transcript	weakly similar to ( 105)AT2G42840| Symbols: PDF1 | PDF1 (PROTODERMAL FACTOR 1) | chr2:17833404-17834503 REVERSEVAR1 COG5048 gb|BJ215681;	1.23
33.99	development.unspecified	ta.3634.2.s1_at	Transcript	weakly similar to ( 119)AT5G15890| Symbols: | similar to unknown protein [Arabidopsis thaliana] (TAIR:AT5G15900.1); similar to hypothetical protein [Cleome spinosa] (GB:ABD96865.1); contains InterPro domain Protein of unknown function DUF231, plant (InterPro:IPR004253) | chr5:5187690-5189351 REVERSEVAR1 gb|BQ789345;	1.41
33.99	development.unspecified	taaffx.10176.1.s1_at	Transcript	weakly similar to ( 140)AT5G51230| Symbols: VEF2, CYR1, EMF2 | EMF2 (EMBRYONIC FLOWER 2) | chr5:20841379-20846570 FORWARD gb|BJ211655;	1.21
33.99	development.unspecified	taaffx.128494.1.s1_at	Transcript	moderately similar to ( 312)AT1G15470| Symbols: | transducin family protein / WD-40 repeat family protein | chr1:5315833-5317691 FORWARD gb|CA646574;	1.01
33.99	development.unspecified	ta.2586.1.s1_x_at	Transcript	weakly similar to ( 132)AT4G10850| Symbols: | nodulin MtN3 family protein | chr4:6675064-6676714 FORWARDVAR1 gb|CA638948;	1.2
33.99	development.unspecified	taaffx.91800.1.s1_at	Transcript	moderately similar to ( 231)AT1G48410| Symbols: AGO1 | AGO1 (ARGONAUTE 1) | chr1:17889953-17895560 REVERSE gb|BJ302282;	1.02
33.99	development.unspecified	ta.25342.1.s1_x_at	Transcript	weakly similar to ( 108)AT2G42840| Symbols: PDF1 | PDF1 (PROTODERMAL FACTOR 1) | chr2:17833404-17834503 REVERSECOG3883 gb|BQ170230;	1.05
33.99	development.unspecified	ta.29541.2.s1_a_at	Transcript	moderately similar to ( 297)AT3G61790| Symbols: | seven in absentia (SINA) family protein | chr3:22882949-22884518 REVERSE gb|CA641542;	1.06
33.99	development.unspecified	taaffx.106850.1.s1_at	Transcript	weakly similar to ( 145)AT4G10180| Symbols: FUS2, DET1 | DET1 (DE-ETIOLATED 1); catalytic | chr4:6346539-6349142 FORWARD gb|CA594111;	1.35
33.99	development.unspecified	taaffx.106850.3.s1_at	Transcript	weakly similar to ( 136)AT4G10180| Symbols: FUS2, DET1 | DET1 (DE-ETIOLATED 1); catalytic | chr4:6346539-6349142 FORWARD gb|BJ268676;	1.11
33.99	development.unspecified	taaffx.109230.1.s1_at	Transcript	weakly similar to ( 104)AT2G47070| Symbols: SPL1 | SPL1 (SQUAMOSA PROMOTER BINDING PROTEIN-LIKE 1); DNA binding / transcription factor | chr2:19344214-19347622 FORWARD gb|CA604393;	1.14
Cell_regulation
30.2.11	signalling.receptor kinases.leucine rich repeat XI	ta.30658.1.a1_at	Transcript	weakly similar to ( 108)AT1G09970| Symbols: | leucine-rich repeat transmembrane protein kinase, putative | chr1:3252410-3255430 FORWARDvery weakly similar to (80.9)RPK1_IPONI gb|AJ606013.1;	-1.01
30.2.99	signalling.receptor kinases.misc	taaffx.128494.1.s1_at	Transcript	moderately similar to ( 312)AT1G15470| Symbols: | transducin family protein / WD-40 repeat family protein | chr1:5315833-5317691 FORWARD gb|CA646574;	1.01
30.3	signalling.calcium	ta.23807.10.s1_at	Transcript	weakly similar to ( 154)AT5G62390| Symbols: ATBAG7 | ATBAG7 (ARABIDOPSIS THALIANA BCL-2-ASSOCIATED ATHANOGENE 7); calmodulin binding | chr5:25069603-25071396 REVERSE gb|BJ272735;	1.64
30.4.1	signalling.phosphinositides.phosphatidylinositol-4-phosphate 5-kinase	ta.4492.2.s1_at	Transcript	very weakly similar to (98.6)AT1G71010| Symbols: | phosphatidylinositol-4-phosphate 5-kinase family protein | chr1:26786501-26792374 FORWARD gb|BJ267564;	1.1
30.5	signalling.G-proteins	ta.10419.1.s1_at	Transcript	moderately similar to ( 324)AT4G29830| Symbols: VIP3 | VIP3 (VERNALIZATION INDEPENDENCE 3); nucleotide binding | chr4:14597734-14599163 FORWARD gb|CD454624;	2.11
30.5	signalling.G-proteins	ta.5076.2.s1_at	Transcript	moderately similar to ( 271)AT3G43300| Symbols: ATMIN7 | ATMIN7 (ARABIDOPSIS THALIANA HOPM INTERACTOR 7); guanyl-nucleotide exchange factor/ protein binding | chr3:15245223-15256022 REVERSE gb|BJ213391;	1.99
30.6	signalling.MAP kinases	ta.4456.1.s1_at	Transcript	moderately similar to ( 487)AT2G42880| Symbols: ATMPK20 | ATMPK20 (Arabidopsis thaliana MAP kinase 20); MAP kinase | chr2:17847649-17851024 REVERSEhighly similar to ( 518)MPK8_ORYSA gb|AJ606017.1;	1.08
30.7	signalling.14-3-3 proteins	taaffx.110008.1.s1_at	Transcript	gb|CA665458;	1.07

[truncated: 5 more sheets: Enzymes, Protein, RNA, DNA, Unknown]
