# Supplementary material for: Transcriptome Profiling of Wheat Seedlings following Treatment with Ultrahigh Diluted Arsenic Trioxide
Source: Evid Based Complement Alternat Med. 2014 Nov 27;2014:851263. doi: 10.1155/2014/851263 (PMC4265686; doi:10.1155/2014/851263)
Supplement: Supplementary file 1 — Complete dataset of up- and down-regulated gene sequences, resulting from MapMan analysis, in the four pairwise comparisons. Table S1: poisoned versus control (P+0 vs C+0); Table S2: poisoned-treated versus control (P+T vs C+0); Table S3: treated control versus control (C+T vs C+0); Table S4: poisoned-treated versus poisoned (P+T vs P+0). [file 851263.f1.zip › 851263.f1/Table S2.xls]

## Sheet: Primary_met
BinCode	BinName	id	type	description	log2FC
AA_metabolism
13.1.4.1.1	amino acid metabolism.synthesis.branched chain group.common.acetolactate synthase	ta.6111.1.s1_at	Transcript	weakly similar to ( 130)AT5G16290| Symbols: | acetolactate synthase small subunit, putative | chr5:5333877-5337390 FORWARD gb|AJ603054;	1.627
13.1.5.3	amino acid metabolism.synthesis.serine-glycine-cysteine group.cysteine	ta.23081.2.s1_a_at	Transcript	weakly similar to ( 140)AT5G39890| Symbols: | similar to unknown protein [Arabidopsis thaliana] (TAIR:AT5G15120.1); similar to unnamed protein product [Vitis vinifera] (GB:CAO14912.1); contains InterPro domain Protein of unknown function DUF1637 (InterPro:IPR012864) | chr5:15991771-15993241 FORWARD gb|BJ309300;	1.05
13.1.6.5.5	amino acid metabolism.synthesis.aromatic aa.tryptophan.tryptophan synthase	ta.27090.1.s1_at	Transcript	moderately similar to ( 376)AT4G27070| Symbols: TSB2 | TSB2 (TRYPTOPHAN SYNTHASE BETA-SUBUNIT); tryptophan synthase | chr4:13586570-13588625 FORWARDmoderately similar to ( 394)TRPB2_MAIZE gb|BT009279.1;	4.214
13.2.6.3	amino acid metabolism.degradation.aromatic aa.tryptophan	taaffx.131737.1.a1_at	Transcript	moderately similar to ( 277)AT4G31810| Symbols: | enoyl-CoA hydratase/isomerase family protein | chr4:15387371-15390296 REVERSE gb|BJ241423;	-1.13
13.2.6.3	amino acid metabolism.degradation.aromatic aa.tryptophan	ta.25580.1.s1_at	Transcript	moderately similar to ( 252)AT4G16800| Symbols: | enoyl-CoA hydratase, putative | chr4:9454950-9456328 REVERSEVAR1 gb|BJ228692;	1.052
Fermentation
TCA -transformation
CHO
Lipid_metabolism
11.1.12	lipid metabolism.FA synthesis and FA elongation.ACP protein	ta.2218.1.s1_at	Transcript	very weakly similar to (95.5)AT1G54580| Symbols: ACP2 | ACP2 (ACYL CARRIER PROTEIN 2) | chr1:20393239-20394437 FORWARDmoderately similar to ( 202)ACP3_HORVU gb|CK215379;	1.175
11.3.7	lipid metabolism.Phospholipid synthesis.cyclopropane-fatty-acyl-phospholipid synthase	ta.4726.1.s1_at	Transcript	weakly similar to ( 122)AT3G23510| Symbols: | cyclopropane fatty acid synthase, putative / CPA-FA synthase, putative | chr3:8428078-8433166 FORWARD gb|BJ270709;	1.839
11.3.7	lipid metabolism.Phospholipid synthesis.cyclopropane-fatty-acyl-phospholipid synthase	ta.8082.1.a1_at	Transcript	weakly similar to ( 157)AT3G23510| Symbols: | cyclopropane fatty acid synthase, putative / CPA-FA synthase, putative | chr3:8428078-8433166 FORWARDCOG5048 VAR1 gb|BQ161248;	1.028
11.3.7	lipid metabolism.Phospholipid synthesis.cyclopropane-fatty-acyl-phospholipid synthase	taaffx.24365.1.s1_at	Transcript	very weakly similar to (96.7)AT3G23530| Symbols: | cyclopropane fatty acid synthase, putative / CPA-FA synthase, putative | chr3:8437479-8442604 FORWARD gb|CA720390;	1.32
11.3.7	lipid metabolism.Phospholipid synthesis.cyclopropane-fatty-acyl-phospholipid synthase	ta.8082.1.a1_x_at	Transcript	weakly similar to ( 157)AT3G23510| Symbols: | cyclopropane fatty acid synthase, putative / CPA-FA synthase, putative | chr3:8428078-8433166 FORWARDCOG5048 VAR1 gb|BQ161248;	1.5
11.4	lipid metabolism.TAG synthesis	ta.21933.1.s1_a_at	Transcript	very weakly similar to (99.8)AT4G25140| Symbols: OLEO1 | OLEO1 (OLEOSIN1) | chr4:12900508-12901269 FORWARDweakly similar to ( 149)OLEO1_MAIZE gb|CD921530;	1.505
11.9.2.1	lipid metabolism.lipid degradation.lipases.triacylglycerol lipase	ta.556.1.s1_x_at	Transcript	weakly similar to ( 176)AT3G14360| Symbols: | lipase class 3 family protein | chr3:4791603-4793541 FORWARD gb|CA671780;	1.089
Co-factors and vitamins
Nucleotides
23.1.2.5	nucleotide metabolism.synthesis.purine.AIR synthase	ta.2335.2.a1_at	Transcript	weakly similar to ( 153)AT3G55010| Symbols: ATPURM, PUR5 | ATPURM/PUR5; phosphoribosylformylglycinamidine cyclo-ligase | chr3:20397795-20399526 FORWARDweakly similar to ( 157)PUR5_VIGUN gb|CA722075;	1.621
23.1.2.20	nucleotide metabolism.synthesis.purine.adenylosuccinate synthase	ta.121.1.s1_at	Transcript	highly similar to ( 516)AT3G57610| Symbols: ATPURA | ATPURA; adenylosuccinate synthase | chr3:21345496-21347580 REVERSEhighly similar to ( 628)PURA_WHEATVAR1 COG5048 COG4886 COG5099 gb|U49387.1;	1.712

## Sheet: Secondary_metab
BinCode	BinName	id	type	description	log2FC
16.8.3	secondary metabolism.flavonoids.dihydroflavonols	ta.9983.1.s1_s_at	Transcript	moderately similar to ( 429)AT5G42800| Symbols: TT3, M318, DFR | DFR (DIHYDROFLAVONOL 4-REDUCTASE); dihydrokaempferol 4-reductase | chr5:17181524-17183092 REVERSEhighly similar to ( 605)DFRA_HORVU gb|AY373831.1;	-1.414
16.8.3	secondary metabolism.flavonoids.dihydroflavonols	ta.9983.2.s1_at	Transcript	moderately similar to ( 420)AT5G42800| Symbols: TT3, M318, DFR | DFR (DIHYDROFLAVONOL 4-REDUCTASE); dihydrokaempferol 4-reductase | chr5:17181524-17183092 REVERSEhighly similar to ( 594)DFRA_HORVUVAR1 gb|AY555573.1;	-1.163
16.8.3	secondary metabolism.flavonoids.dihydroflavonols	ta.14243.1.a1_at	Transcript	weakly similar to ( 130)AT3G51240| Symbols: TT6, F3'H, F3H | F3H (TRANSPARENT TESTA 6); naringenin 3-dioxygenase | chr3:19036388-19037637 FORWARDweakly similar to ( 164)FL3H_HORVU gb|BQ838987;	-1.465

## Sheet: Hormone_metab
BinCode	BinName	id	type	description	log2FC
17.1.3	hormone metabolism.abscisic acid.induced-regulated-responsive-activated	ta.2798.1.s1_x_at	Transcript	weakly similar to ( 114)AT2G40170| Symbols: ATEM6, GEA6 | ATEM6/GEA6 (ARABIDOPSIS EARLY METHIONINE-LABELLED 6) | chr2:16786870-16787245 REVERSEweakly similar to ( 152)EM1_WHEAT gb|BJ290016;	2.77
17.1.3	hormone metabolism.abscisic acid.induced-regulated-responsive-activated	ta.25025.1.s1_at	Transcript	weakly similar to ( 113)AT2G40170| Symbols: ATEM6, GEA6 | ATEM6/GEA6 (ARABIDOPSIS EARLY METHIONINE-LABELLED 6) | chr2:16786870-16787245 REVERSEweakly similar to ( 150)LE19A_HORVU gb|CD490538;	2.549
17.1.3	hormone metabolism.abscisic acid.induced-regulated-responsive-activated	ta.25025.1.s1_x_at	Transcript	weakly similar to ( 113)AT2G40170| Symbols: ATEM6, GEA6 | ATEM6/GEA6 (ARABIDOPSIS EARLY METHIONINE-LABELLED 6) | chr2:16786870-16787245 REVERSEweakly similar to ( 150)LE19A_HORVU gb|CD490538;	2.149
17.2.3	hormone metabolism.auxin.induced-regulated-responsive-activated	taaffx.133664.1.s1_at	Transcript	weakly similar to ( 123)AT1G60680| Symbols: AGD2 | AGD2 (ARF-GAP DOMAIN 2); aldo-keto reductase | chr1:22351489-22352901 REVERSEweakly similar to ( 123)A115_TOBAC gb|CA683001;	1.25
17.3.1.2.3	hormone metabolism.brassinosteroid.synthesis-degradation.sterols.CYP51	ta.8390.1.s1_at	Transcript	weakly similar to ( 119)AT1G11680| Symbols: EMB1738, CYP51A2, CYP51, CYP51G1 | CYP51G1 (CYTOCHROME P450 51); oxygen binding | chr1:3938925-3940585 FORWARDweakly similar to ( 125)CP51_SORBI gb|BQ161830;	-1.189
17.5.3	hormone metabolism.ethylene.induced-regulated-responsive-activated	ta.9564.1.s1_x_at	Transcript	weakly similar to ( 134)AT3G11930| Symbols: | universal stress protein (USP) family protein | chr3:3776377-3777399 FORWARD gb|BJ288777;	1.582
17.5.3	hormone metabolism.ethylene.induced-regulated-responsive-activated	ta.9564.1.s1_at	Transcript	weakly similar to ( 134)AT3G11930| Symbols: | universal stress protein (USP) family protein | chr3:3776377-3777399 FORWARD gb|BJ288777;	2.226

## Sheet: Photosynthesis
BinCode	BinName	id	type	description	log2FC
1.1.1.2	PS.lightreaction.photosystem II.PSII polypeptide subunits	ta.3987.1.s1_x_at	Transcript	weakly similar to ( 107)AT5G02120| Symbols: OHP | OHP (ONE HELIX PROTEIN) | chr5:419141-419630 FORWARD gb|BJ256435;	1.218

## Sheet: Cell_wall
BinCode	BinName	id	type	description	log2FC
10.7	cell wall.modification	ta.20221.1.s1_at	Transcript	very weakly similar to (83.6)AT1G20190| Symbols: EXP11, ATEXP11, ATHEXP ALPHA 1.14, ATEXPA11 | ATEXPA11 (ARABIDOPSIS THALIANA EXPANSIN A11) | chr1:6998753-6999701 REVERSEweakly similar to ( 102)EXPA1_ORYSA gb|CA637685;	1.482

## Sheet: Mitoch_transport
BinCode	BinName	id	type	description	log2FC

## Sheet: Metal_handling
BinCode	BinName	id	type	description	log2FC
15.2	metal handling.binding, chelation and storage	ta.2799.1.s1_x_at	Transcript	very weakly similar to (96.3)EC1_WHEAT gb|CD906539;	1.294

## Sheet: Biodegradation_xenob
BinCode	BinName	id	type	description	log2FC
24.2	Biodegradation of Xenobiotics.lactoylglutathione lyase	ta.20582.1.s1_x_at	Transcript	weakly similar to ( 164)AT1G07645| Symbols: | lactoylglutathione lyase family protein / glyoxalase I family protein | chr1:2367609-2368346 REVERSE gb|BJ296527;	1.744
24.2	Biodegradation of Xenobiotics.lactoylglutathione lyase	ta.20582.1.s1_a_at	Transcript	weakly similar to ( 164)AT1G07645| Symbols: | lactoylglutathione lyase family protein / glyoxalase I family protein | chr1:2367609-2368346 REVERSE gb|BJ296527;	1.556
24.2	Biodegradation of Xenobiotics.lactoylglutathione lyase	ta.20582.2.s1_x_at	Transcript	weakly similar to ( 175)AT1G07645| Symbols: | lactoylglutathione lyase family protein / glyoxalase I family protein | chr1:2367609-2368346 REVERSE gb|CD915945;	1.085

## Sheet: Stress
BinCode	BinName	id	type	description	log2FC
Biotic
20.1	stress.biotic	ta.26340.1.a1_at	Transcript	weakly similar to ( 155)AT3G12500| Symbols: PR3, PR-3, CHI-B, B-CHI, ATHCHIB | ATHCHIB (BASIC CHITINASE); chitinase | chr3:3962508-3963952 REVERSEweakly similar to ( 173)CHIC_SECCE gb|CK198901;	1.414
20.1	stress.biotic	ta.27389.2.s1_x_at	Transcript	weakly similar to ( 107)THG2_WHEAT gb|BJ297034;	4.414
20.1	stress.biotic	ta.21556.1.s1_at	Transcript	weakly similar to ( 101)WIR1B_WHEAT gb|CA684533;	-1.094
20.1	stress.biotic	ta.9226.1.s1_at	Transcript	weakly similar to ( 194)AT3G04720| Symbols: HEL, PR-4, PR4 | PR4 (PATHOGENESIS-RELATED 4) | chr3:1285697-1286537 REVERSEmoderately similar to ( 288)WHW1_WHEAT gb|CD915938;	1.085
20.1	stress.biotic	ta.2784.1.a1_at	Transcript	weakly similar to ( 161)AT3G12500| Symbols: PR3, PR-3, CHI-B, B-CHI, ATHCHIB | ATHCHIB (BASIC CHITINASE); chitinase | chr3:3962508-3963952 REVERSEweakly similar to ( 180)CHIQ_TOBAC gb|AB029934.1;	1.113
20.1.7	stress.biotic.PR-proteins	ta.25549.1.s1_at	Transcript	weakly similar to ( 132)AT3G07040| Symbols: RPS3, RPM1 | RPM1 (RESISTANCE TO P. SYRINGAE PV MACULICOLA 1); protein binding | chr3:2226250-2229030 REVERSE gb|CK163901;	1.097
Abiotic

## Sheet: Cell
BinCode	BinName	id	type	description	log2FC
Cell_Organization
31.1	cell.organisation	ta.6212.3.s1_at	Transcript	very weakly similar to (84.0)AT1G25280| Symbols: AtTLP10 | AtTLP10 (TUBBY LIKE PROTEIN 10) | chr1:8865663-8866595 FORWARD gb|CA648151;	1.31
31.1	cell.organisation	ta.14590.3.s1_at	Transcript	weakly similar to ( 129)AT5G10230| Symbols: ANNAT7, ANN7 | ANN7/ANNAT7 (ANNEXIN ARABIDOPSIS 7); calcium ion binding / calcium-dependent phospholipid binding | chr5:3209739-3211397 REVERSEweakly similar to ( 123)ANX4_FRAAN gb|CK196800;	1.356
31.4	cell.vesicle transport	ta.10236.1.a1_at	Transcript	very weakly similar to (85.1)AT2G45140| Symbols: | vesicle-associated membrane protein, putative / VAMP, putative | chr2:18618104-18620046 FORWARD gb|CK205521;	1.933
31.4	cell.vesicle transport	ta.7311.3.s1_a_at	Transcript	weakly similar to ( 135)AT3G60600| Symbols: VAP, (AT)VAP, VAP27, VAP27-1 | VAP27-1 (VAMP/SYNAPTOBREVIN-ASSOCIATED PROTEIN 27-1) | chr3:22411512-22412644 FORWARD gb|CA639744;	2.227
Cell_transport
34.3	transport.amino acids	ta.28479.1.s1_at	Transcript	weakly similar to ( 177)AT5G40780| Symbols: LTH1, LHT1 | LHT1 (LYSINE HISTIDINE TRANSPORTER 1); amino acid transmembrane transporter | chr5:16341051-16344310 FORWARDCOG5048 gb|BJ286275;	1.037
34.13	transport.peptides and oligopeptides	ta.5210.2.s1_a_at	Transcript	moderately similar to ( 260)AT2G02040| Symbols: PTR2-B, NTR1, ATPTR2-B | ATPTR2-B (NITRATE TRANSPORTER 1); transporter | chr2:487541-489706 FORWARD gb|BQ168369;	-1.359
34.99	transport.misc	ta.8601.1.s1_at	Transcript	moderately similar to ( 273)AT2G32230| Symbols: | pentatricopeptide (PPR) repeat-containing protein | chr2:13686685-13688833 REVERSE gb|CD373723;	-1.108
34.99	transport.misc	ta.28555.1.s1_at	Transcript	weakly similar to ( 167)AT1G04560| Symbols: | AWPM-19-like membrane family protein | chr1:1245069-1245887 FORWARD gb|BQ166465;	1.302
34.99	transport.misc	ta.14259.1.s1_at	Transcript	weakly similar to ( 185)AT1G04560| Symbols: | AWPM-19-like membrane family protein | chr1:1245069-1245887 FORWARD gb|BJ300061;	2.489
Cell_development
33.1	development.storage proteins	ta.20518.3.s1_at	Transcript	very weakly similar to (99.4)AT3G22640| Symbols: | cupin family protein | chr3:8011909-8013890 REVERSEweakly similar to ( 131)GLB1_MAIZE gb|BJ297179;	1.962
33.1	development.storage proteins	ta.30754.1.s1_at	Transcript	weakly similar to ( 196)AT2G28490| Symbols: | cupin family protein | chr2:12185889-12188060 REVERSE gb|BJ295650;	1.793
33.2	development.late embryogenesis abundant	ta.13396.3.s1_at	Transcript	gb|CA740972;	2.351
33.2	development.late embryogenesis abundant	ta.25026.1.s1_at	Transcript	weakly similar to ( 115)AT1G01470| Symbols: LSR3, LEA14 | LEA14 (LATE EMBRYOGENESIS ABUNDANT 14) | chr1:172295-172826 REVERSEweakly similar to ( 127)LEA14_SOYBNCOG5048 gb|BQ804965;	1.065
33.2	development.late embryogenesis abundant	ta.6019.1.s1_at	Transcript	gb|BE517508;	5.093
33.2	development.late embryogenesis abundant	ta.13396.1.s1_at	Transcript	gb|BQ579546;	1.378
33.2	development.late embryogenesis abundant	ta.5888.1.s1_s_at	Transcript	gb|BQ807116;	2.436
33.99	development.unspecified	ta.14071.1.s1_x_at	Transcript	moderately similar to ( 243)AT1G21890| Symbols: | nodulin MtN21 family protein | chr1:7682797-7685570 REVERSE gb|CA637917;	1.827
33.99	development.unspecified	ta.11956.1.a1_at	Transcript	weakly similar to ( 103)AT2G42840| Symbols: PDF1 | PDF1 (PROTODERMAL FACTOR 1) | chr2:17833404-17834503 REVERSE gb|BQ171149;	1.752
33.99	development.unspecified	ta.765.1.s1_x_at	Transcript	very weakly similar to (89.4)AT5G25940| Symbols: | early nodulin-related | chr5:9054255-9055154 REVERSEvery weakly similar to (82.4)NO93_SOYBN gb|CA605374;	1.294
Cell_regulation
30.2.11	signalling.receptor kinases.leucine rich repeat XI	ta.20516.1.s1_x_at	Transcript	moderately similar to ( 209)AT5G06860| Symbols: PGIP1 | PGIP1 (POLYGALACTURONASE INHIBITING PROTEIN 1); protein binding | chr5:2132374-2133435 FORWARDweakly similar to ( 172)PGIP3_PHAVU gb|CA635174;	2.52
30.2.12	signalling.receptor kinases.leucine rich repeat XII	taaffx.53376.1.s1_at	Transcript	weakly similar to ( 121)AT3G47570| Symbols: | leucine-rich repeat transmembrane protein kinase, putative | chr3:17538596-17541733 FORWARD gb|CA747224;	1.059
30.2.25	signalling.receptor kinases.wall associated kinase	ta.27859.1.a1_at	Transcript	very weakly similar to (87.0)AT1G21240| Symbols: WAK3 | WAK3 (WALL ASSOCIATED KINASE 3); kinase/ protein serine/threonine kinase | chr1:7434292-7436691 FORWARD gb|CD922428;	1.317
30.5	signalling.G-proteins	ta.10235.1.s1_at	Transcript	weakly similar to ( 134)AT5G41940| Symbols: | RabGAP/TBC domain-containing protein | chr5:16799267-16802679 FORWARD gb|BJ246114;	1.516

[truncated: 5 more sheets: Enzymes, Protein, RNA, DNA, Unknown]
