# Supplementary material for: Transcriptome Profiling of Wheat Seedlings following Treatment with Ultrahigh Diluted Arsenic Trioxide
Source: Evid Based Complement Alternat Med. 2014 Nov 27;2014:851263. doi: 10.1155/2014/851263 (PMC4265686; doi:10.1155/2014/851263)
Supplement: Supplementary file 1 — Complete dataset of up- and down-regulated gene sequences, resulting from MapMan analysis, in the four pairwise comparisons. Table S1: poisoned versus control (P+0 vs C+0); Table S2: poisoned-treated versus control (P+T vs C+0); Table S3: treated control versus control (C+T vs C+0); Table S4: poisoned-treated versus poisoned (P+T vs P+0). [file 851263.f1.zip › 851263.f1/Table S3.xls]

## Sheet: Primary_met
BinCode	BinName	id	type	description	log2FC
AA_metabolism
13.1.1.3.11	amino acid metabolism.synthesis.central amino acid metabolism.alanine.alanine-glyoxylate aminotransferase	ta.4834.1.s1_at	Transcript	highly similar to ( 650)AT3G08860| Symbols: | alanine--glyoxylate aminotransferase, putative / beta-alanine-pyruvate aminotransferase, putative / AGT, putative | chr3:2696760-2699093 REVERSEvery weakly similar to (94.4)GSA_CHLRE gb|BQ803694;	-1.117
13.1.3.1	amino acid metabolism.synthesis.aspartate family.asparagine	ta.5645.1.s1_x_at	Transcript	moderately similar to ( 485)AT5G65010| Symbols: ASN2 | ASN2 (ASPARAGINE SYNTHETASE 2); asparagine synthase (glutamine-hydrolyzing) | chr5:25986450-25989504 FORWARDhighly similar to ( 516)ASNS_MAIZE gb|CA609920;	-1.932
13.1.3.1	amino acid metabolism.synthesis.aspartate family.asparagine	ta.5645.2.s1_x_at	Transcript	weakly similar to ( 153)AT5G10240| Symbols: ASN3 | ASN3 (ASPARAGINE SYNTHETASE 3); asparagine synthase (glutamine-hydrolyzing) | chr5:3212935-3216419 REVERSEweakly similar to ( 156)ASNS_ASPOF gb|CA707112;	-1.015
13.1.3.1	amino acid metabolism.synthesis.aspartate family.asparagine	ta.5645.2.s1_at	Transcript	weakly similar to ( 153)AT5G10240| Symbols: ASN3 | ASN3 (ASPARAGINE SYNTHETASE 3); asparagine synthase (glutamine-hydrolyzing) | chr5:3212935-3216419 REVERSEweakly similar to ( 156)ASNS_ASPOF gb|CA707112;	-1.26
13.1.4.1.1	amino acid metabolism.synthesis.branched chain group.common.acetolactate synthase	ta.6111.1.s1_at	Transcript	weakly similar to ( 130)AT5G16290| Symbols: | acetolactate synthase small subunit, putative | chr5:5333877-5337390 FORWARD gb|AJ603054;	1.103
13.1.4.1.4	amino acid metabolism.synthesis.branched chain group.common.branched-chain amino acid aminotransferase	ta.27420.1.s1_at	Transcript	moderately similar to ( 341)AT3G49680| Symbols: ATBCAT-3, BCAT3 | ATBCAT-3/BCAT3 (BRANCHED-CHAIN AMINOTRANSFERASE 3) | chr3:18433753-18436458 FORWARD gb|BT009368.1;	-1.308
13.1.5.3	amino acid metabolism.synthesis.serine-glycine-cysteine group.cysteine	ta.23081.2.s1_a_at	Transcript	weakly similar to ( 140)AT5G39890| Symbols: | similar to unknown protein [Arabidopsis thaliana] (TAIR:AT5G15120.1); similar to unnamed protein product [Vitis vinifera] (GB:CAO14912.1); contains InterPro domain Protein of unknown function DUF1637 (InterPro:IPR012864) | chr5:15991771-15993241 FORWARD gb|BJ309300;	-1.083
13.1.6.5.5	amino acid metabolism.synthesis.aromatic aa.tryptophan.tryptophan synthase	ta.10688.1.s1_at	Transcript	weakly similar to ( 186)AT4G02610| Symbols: | tryptophan synthase, alpha subunit, putative | chr4:1147662-1149217 FORWARDmoderately similar to ( 259)TRPA_MAIZE gb|AB094060.1;	-1.999
13.1.6.5.5	amino acid metabolism.synthesis.aromatic aa.tryptophan.tryptophan synthase	ta.27090.1.s1_at	Transcript	moderately similar to ( 376)AT4G27070| Symbols: TSB2 | TSB2 (TRYPTOPHAN SYNTHASE BETA-SUBUNIT); tryptophan synthase | chr4:13586570-13588625 FORWARDmoderately similar to ( 394)TRPB2_MAIZE gb|BT009279.1;	-1.997
13.2.3.2	amino acid metabolism.degradation.aspartate family.threonine	ta.23813.1.s1_at	Transcript	moderately similar to ( 428)AT1G67280| Symbols: | lactoylglutathione lyase, putative / glyoxalase I, putative | chr1:25192226-25193797 REVERSEmoderately similar to ( 349)LGUL_ORYSAVAR1 COG5048 gb|CK157489;	-1.846
13.2.3.5	amino acid metabolism.degradation.aspartate family.lysine	taaffx.52819.1.s1_at	Transcript	moderately similar to ( 236)AT5G11950| Symbols: | Encodes a protein of unknown function. It has been crystallized and shown to be structurally almost identical to the protein encoded by At2G37210. | chr5:3855073-3856816 FORWARD gb|CA700588;	-1.249
Fermentation
5.10	fermentation.aldehyde dehydrogenase	ta.9925.1.a1_a_at	Transcript	very weakly similar to (95.9)AT4G36250| Symbols: ALDH3F1 | ALDH3F1 (ALDEHYDE DEHYDROGENASE 3F1); 3-chloroallyl aldehyde dehydrogenase/ aldehyde dehydrogenase (NAD) | chr4:17151032-17153384 FORWARD gb|BE516413;	-1.029
TCA -transformation
8.2.10	TCA / org. transformation.other organic acid transformaitons.malic	ta.5728.1.s1_at	Transcript	moderately similar to ( 405)AT2G19900| Symbols: ATNADP-ME1 | ATNADP-ME1 (NADP-MALIC ENZYME 1); malate dehydrogenase (oxaloacetate-decarboxylating) (NADP+)/ malic enzyme/ oxidoreductase, acting on NADH or NADPH, NAD or NADP as acceptor | chr2:8599188-8602485 REVERSEmoderately similar to ( 413)MAOX_PHAVU gb|CD912228;	-2.393
CHO
2.2.1.3.2	major CHO metabolism.degradation.sucrose.invertases.cell wall	ta.2789.2.s1_at	Transcript	moderately similar to ( 382)AT1G62660| Symbols: | beta-fructosidase (BFRUCT3) / beta-fructofuranosidase / invertase, vacuolar | chr1:23203614-23207180 FORWARDmoderately similar to ( 417)INVA_PHAAU VAR1 COG5048 gb|CK170981;	-1.257
2.2.1.3.2	major CHO metabolism.degradation.sucrose.invertases.cell wall	ta.2789.1.s1_a_at	Transcript	highly similar to ( 560)AT1G62660| Symbols: | beta-fructosidase (BFRUCT3) / beta-fructofuranosidase / invertase, vacuolar | chr1:23203614-23207180 FORWARDhighly similar to ( 621)INV1_MAIZE VAR1 COG5048 COG4886 MopB_Res-Cmplx1_Nad11-M COG5099 Merozoite_SPAM gb|AB029887.1;	-1.718
2.2.1.3.2	major CHO metabolism.degradation.sucrose.invertases.cell wall	ta.2789.2.s1_x_at	Transcript	moderately similar to ( 382)AT1G62660| Symbols: | beta-fructosidase (BFRUCT3) / beta-fructofuranosidase / invertase, vacuolar | chr1:23203614-23207180 FORWARDmoderately similar to ( 417)INVA_PHAAU VAR1 COG5048 gb|CK170981;	-1.304
2.2.1.3.2	major CHO metabolism.degradation.sucrose.invertases.cell wall	ta.2789.1.s1_at	Transcript	highly similar to ( 560)AT1G62660| Symbols: | beta-fructosidase (BFRUCT3) / beta-fructofuranosidase / invertase, vacuolar | chr1:23203614-23207180 FORWARDhighly similar to ( 621)INV1_MAIZE VAR1 COG5048 COG4886 MopB_Res-Cmplx1_Nad11-M COG5099 Merozoite_SPAM gb|AB029887.1;	-1.429
2.2.1.3.3	major CHO metabolism.degradation.sucrose.invertases.vacuolar	ta.2789.1.s1_a_at	Transcript	highly similar to ( 560)AT1G62660| Symbols: | beta-fructosidase (BFRUCT3) / beta-fructofuranosidase / invertase, vacuolar | chr1:23203614-23207180 FORWARDhighly similar to ( 621)INV1_MAIZE VAR1 COG5048 COG4886 MopB_Res-Cmplx1_Nad11-M COG5099 Merozoite_SPAM gb|AB029887.1;	-1.718
2.2.1.3.3	major CHO metabolism.degradation.sucrose.invertases.vacuolar	ta.2789.1.s1_at	Transcript	highly similar to ( 560)AT1G62660| Symbols: | beta-fructosidase (BFRUCT3) / beta-fructofuranosidase / invertase, vacuolar | chr1:23203614-23207180 FORWARDhighly similar to ( 621)INV1_MAIZE VAR1 COG5048 COG4886 MopB_Res-Cmplx1_Nad11-M COG5099 Merozoite_SPAM gb|AB029887.1;	-1.429
3.8.2	minor CHO metabolism.galactose.alpha-galactosidases	taaffx.58652.1.s1_at	Transcript	weakly similar to ( 122)AT5G08370| Symbols: ATAGAL2 | ATAGAL2 (ARABIDOPSIS THALIANA ALPHA-GALACTOSIDASE 2); alpha-galactosidase | chr5:2691117-2693442 REVERSEweakly similar to ( 158)AGAL_ORYSA gb|CA617595;	1.015
Lipid_metabolism
11.1.8	lipid metabolism.FA synthesis and FA elongation.acyl coa ligase	ta.23282.2.a1_at	Transcript	very weakly similar to (90.1)AT5G23050| Symbols: | acyl-activating enzyme 17 (AAE17) | chr5:7731516-7735402 REVERSE gb|CA593333;	-1.14
11.3.7	lipid metabolism.Phospholipid synthesis.cyclopropane-fatty-acyl-phospholipid synthase	ta.9664.1.a1_at	Transcript	weakly similar to ( 189)AT3G23510| Symbols: | cyclopropane fatty acid synthase, putative / CPA-FA synthase, putative | chr3:8428078-8433166 FORWARD gb|BQ483035;	-1.544
11.3.7	lipid metabolism.Phospholipid synthesis.cyclopropane-fatty-acyl-phospholipid synthase	ta.4726.1.s1_at	Transcript	weakly similar to ( 122)AT3G23510| Symbols: | cyclopropane fatty acid synthase, putative / CPA-FA synthase, putative | chr3:8428078-8433166 FORWARD gb|BJ270709;	-1.167
11.6	lipid metabolism.lipid transfer proteins etc	taaffx.130058.1.s1_x_at	Transcript	very weakly similar to (88.6)AT5G59310| Symbols: LTP4 | LTP4 (LIPID TRANSFER PROTEIN 4); lipid binding | chr5:23942522-23942998 REVERSEweakly similar to ( 129)NLTP3_ORYSA gb|AJ611761;	-1.854
11.8	lipid metabolism.''exotics'' (steroids, squalene etc)	taaffx.16367.1.s1_at	Transcript	weakly similar to ( 129)AT1G74100| Symbols: | sulfotransferase family protein | chr1:27868150-27869166 REVERSE gb|BE493623;	-1.281
11.8	lipid metabolism.''exotics'' (steroids, squalene etc)	ta.26323.1.a1_at	Transcript	weakly similar to ( 162)AT5G42890| Symbols: | sterol carrier protein 2 (SCP-2) family protein | chr5:17211686-17213138 REVERSE gb|CD490702;	-1.309
11.9.2	lipid metabolism.lipid degradation.lipases	ta.9749.1.a1_at	Transcript	very weakly similar to (88.2)AT2G31100| Symbols: | lipase, putative | chr2:13263815-13265251 REVERSE gb|BJ229752;	-2.451
11.9.2.1	lipid metabolism.lipid degradation.lipases.triacylglycerol lipase	ta.556.1.s1_x_at	Transcript	weakly similar to ( 176)AT3G14360| Symbols: | lipase class 3 family protein | chr3:4791603-4793541 FORWARD gb|CA671780;	1.062
11.9.2.1	lipid metabolism.lipid degradation.lipases.triacylglycerol lipase	ta.7740.1.a1_at	Transcript	weakly similar to ( 192)AT4G18550| Symbols: | lipase class 3 family protein | chr4:10225017-10226873 REVERSEVAR1 COG5048 gb|CK198840;	1.043
11.9.3.3	lipid metabolism.lipid degradation.lysophospholipases.glycerophosphodiester phosphodiesterase	ta.209.1.s1_at	Transcript	moderately similar to ( 498)AT1G66970| Symbols: | glycerophosphoryl diester phosphodiesterase family protein | chr1:24996409-24999668 REVERSE gb|AF031231.1;	-1.461
Co-factors and vitamins
18	Co-factor and vitamine metabolism	ta.27416.1.s1_at	Transcript	moderately similar to ( 244)AT5G48840| Symbols: PANC | PANC (Arabidopsis homolog of bacterial panC); pantoate-beta-alanine ligase | chr5:19821049-19822267 REVERSEmoderately similar to ( 298)PANC_ORYSA gb|BT009390.1;	-1.065
Nucleotides
23.1.2.5	nucleotide metabolism.synthesis.purine.AIR synthase	ta.2335.2.a1_at	Transcript	weakly similar to ( 153)AT3G55010| Symbols: ATPURM, PUR5 | ATPURM/PUR5; phosphoribosylformylglycinamidine cyclo-ligase | chr3:20397795-20399526 FORWARDweakly similar to ( 157)PUR5_VIGUN gb|CA722075;	1.498
23.1.2.20	nucleotide metabolism.synthesis.purine.adenylosuccinate synthase	ta.121.1.s1_at	Transcript	highly similar to ( 516)AT3G57610| Symbols: ATPURA | ATPURA; adenylosuccinate synthase | chr3:21345496-21347580 REVERSEhighly similar to ( 628)PURA_WHEATVAR1 COG5048 COG4886 COG5099 gb|U49387.1;	1.273
23.2	nucleotide metabolism.degradation	ta.11205.1.a1_a_at	Transcript	weakly similar to ( 174)AT4G04955| Symbols: ATALN | ATALN (ARABIDOPSIS ALLANTOINASE); allantoinase/ hydrolase | chr4:2522299-2525257 REVERSE gb|CD893576;	-1.029

## Sheet: Secondary_metab
BinCode	BinName	id	type	description	log2FC
16.2	secondary metabolism.phenylpropanoids	ta.7176.2.s1_x_at	Transcript	weakly similar to ( 103)ZRP4_MAIZEVAR1 COG5048 gb|CK196344;	-1.997
16.2	secondary metabolism.phenylpropanoids	ta.5399.1.s1_a_at	Transcript	weakly similar to ( 135)ZRP4_MAIZECOG5048 gb|CK198328;	-2.094
16.2.1.1	secondary metabolism.phenylpropanoids.lignin biosynthesis.PAL	ta.7022.1.s1_s_at	Transcript	moderately similar to ( 455)AT3G10340| Symbols: PAL4 | phenylalanine ammonia-lyase, putative | chr3:3204265-3207814 FORWARDhighly similar to ( 517)PALY_WHEAT gb|BJ281221;	1.012
16.2.1.1	secondary metabolism.phenylpropanoids.lignin biosynthesis.PAL	ta.9220.1.s1_a_at	Transcript	moderately similar to ( 414)AT2G37040| Symbols: PAL1 | PAL1 (PHE AMMONIA LYASE 1); phenylalanine ammonia-lyase | chr2:15564681-15567316 REVERSEmoderately similar to ( 449)PALY_WHEAT VAR1 COG5048 COG5099 COG4886 gb|CK210556;	1.132
16.2.1.9	secondary metabolism.phenylpropanoids.lignin biosynthesis.COMT	ta.23042.1.s1_x_at	Transcript	weakly similar to ( 160)AT5G54160| Symbols: OMT1, ATOMT1 | ATOMT1 (O-METHYLTRANSFERASE 1) | chr5:21999301-22001393 FORWARDweakly similar to ( 200)OMT1_ORYSA gb|BE517350;	-1.177
16.2.1.10	secondary metabolism.phenylpropanoids.lignin biosynthesis.CAD	ta.2659.1.s1_at	Transcript	very weakly similar to (87.0)AT4G37980| Symbols: ELI3-1 | ELI3-1 (ELICITOR-ACTIVATED GENE 3); binding / catalytic/ oxidoreductase/ zinc ion binding | chr4:17852664-17853908 FORWARDvery weakly similar to (87.0)MTDH_PETCR gb|BE420383;	1.28
16.7	secondary metabolism.wax	ta.6603.2.s1_x_at	Transcript	moderately similar to ( 398)AT1G02205| Symbols: CER1 | CER1 (ECERIFERUM 1) | chr1:418818-422154 FORWARDVAR1 gb|CK207205;	-1.701
16.7	secondary metabolism.wax	ta.6603.3.s1_a_at	Transcript	weakly similar to ( 130)AT2G37700| Symbols: | similar to CER1 protein, putative [Arabidopsis thaliana] (TAIR:AT1G02190.1); similar to unnamed protein product [Vitis vinifera] (GB:CAO17291.1); contains InterPro domain Sterol desaturase; (InterPro:IPR006088) | chr2:15818719-15821254 REVERSE gb|BJ209206;	-1.423
16.8.2	secondary metabolism.flavonoids.chalcones	ta.7099.2.s1_at	Transcript	weakly similar to ( 106)AT5G13930| Symbols: CHS, TT4, ATCHS | ATCHS/CHS/TT4 (CHALCONE SYNTHASE); naringenin-chalcone synthase | chr5:4488764-4490037 FORWARDweakly similar to ( 121)CHS2_SECCE gb|BJ301775;	-1.826
16.8.2	secondary metabolism.flavonoids.chalcones	ta.7099.1.a1_at	Transcript	weakly similar to ( 193)AT5G13930| Symbols: CHS, TT4, ATCHS | ATCHS/CHS/TT4 (CHALCONE SYNTHASE); naringenin-chalcone synthase | chr5:4488764-4490037 FORWARDmoderately similar to ( 220)CHS2_SECCEVAR1 gb|CK155175;	-2.27
16.8.3	secondary metabolism.flavonoids.dihydroflavonols	ta.9983.1.s1_s_at	Transcript	moderately similar to ( 429)AT5G42800| Symbols: TT3, M318, DFR | DFR (DIHYDROFLAVONOL 4-REDUCTASE); dihydrokaempferol 4-reductase | chr5:17181524-17183092 REVERSEhighly similar to ( 605)DFRA_HORVU gb|AY373831.1;	-1.313
16.8.3	secondary metabolism.flavonoids.dihydroflavonols	ta.9983.2.s1_at	Transcript	moderately similar to ( 420)AT5G42800| Symbols: TT3, M318, DFR | DFR (DIHYDROFLAVONOL 4-REDUCTASE); dihydrokaempferol 4-reductase | chr5:17181524-17183092 REVERSEhighly similar to ( 594)DFRA_HORVUVAR1 gb|AY555573.1;	-1.445
16.8.3	secondary metabolism.flavonoids.dihydroflavonols	ta.14243.1.a1_at	Transcript	weakly similar to ( 130)AT3G51240| Symbols: TT6, F3'H, F3H | F3H (TRANSPARENT TESTA 6); naringenin 3-dioxygenase | chr3:19036388-19037637 FORWARDweakly similar to ( 164)FL3H_HORVU gb|BQ838987;	-1.636

## Sheet: Hormone_metab
BinCode	BinName	id	type	description	log2FC
17.1.2	hormone metabolism.abscisic acid.signal transduction	ta.42.1.s1_at	Transcript	weakly similar to ( 195)AT3G24650| Symbols: ABI3 | ABI3 (ABA INSENSITIVE 3); DNA binding / transcription activator/ transcription factor | chr3:8997918-9000787 FORWARDmoderately similar to ( 337)VIV_ORYSA VAR1 COG5048 COG4886 MopB_Res-Cmplx1_Nad11-M Merozoite_SPAM COG5099 gb|AB047554.1;	-1.916
17.2.3	hormone metabolism.auxin.induced-regulated-responsive-activated	ta.18723.2.s1_at	Transcript	very weakly similar to (92.8)AT1G29430| Symbols: | auxin-responsive family protein | chr1:10302787-10303212 REVERSE gb|CA676141;	-1.3
17.2.3	hormone metabolism.auxin.induced-regulated-responsive-activated	ta.26922.1.s1_at	Transcript	weakly similar to ( 164)AT1G60730| Symbols: | aldo/keto reductase family protein | chr1:22362278-22363747 REVERSEweakly similar to ( 107)A115_TOBAC gb|BJ230821;	1.02
17.2.3	hormone metabolism.auxin.induced-regulated-responsive-activated	ta.25492.1.s1_at	Transcript	moderately similar to ( 284)AT1G60710| Symbols: ATB2 | ATB2; oxidoreductase | chr1:22358738-22360292 REVERSEmoderately similar to ( 273)A115_TOBAC gb|BE404327;	1.056
17.2.3	hormone metabolism.auxin.induced-regulated-responsive-activated	taaffx.132270.1.a1_at	Transcript	very weakly similar to (87.0)AT1G29450| Symbols: | auxin-responsive protein, putative | chr1:10305967-10306392 REVERSE gb|CK211144;	-1.278
17.2.3	hormone metabolism.auxin.induced-regulated-responsive-activated	taaffx.133664.1.s1_at	Transcript	weakly similar to ( 123)AT1G60680| Symbols: AGD2 | AGD2 (ARF-GAP DOMAIN 2); aldo-keto reductase | chr1:22351489-22352901 REVERSEweakly similar to ( 123)A115_TOBAC gb|CA683001;	1.616
17.3.1.2.3	hormone metabolism.brassinosteroid.synthesis-degradation.sterols.CYP51	taaffx.107507.1.s1_at	Transcript	very weakly similar to (87.4)AT1G11680| Symbols: EMB1738, CYP51A2, CYP51, CYP51G1 | CYP51G1 (CYTOCHROME P450 51); oxygen binding | chr1:3938925-3940585 FORWARDvery weakly similar to (90.1)CP51_SORBI gb|CA690543;	1.525
17.3.1.2.3	hormone metabolism.brassinosteroid.synthesis-degradation.sterols.CYP51	ta.8390.1.s1_at	Transcript	weakly similar to ( 119)AT1G11680| Symbols: EMB1738, CYP51A2, CYP51, CYP51G1 | CYP51G1 (CYTOCHROME P450 51); oxygen binding | chr1:3938925-3940585 FORWARDweakly similar to ( 125)CP51_SORBI gb|BQ161830;	1.605
17.6.3	hormone metabolism.gibberelin.induced-regulated-responsive-activated	ta.338.1.s1_at	Transcript	weakly similar to ( 120)AT3G10185| Symbols: | Encodes a Gibberellin-regulated GASA/GAST/Snakin family protein | chr3:3145584-3146204 FORWARD gb|BF484849;	-2.049
17.6.3	hormone metabolism.gibberelin.induced-regulated-responsive-activated	ta.14043.1.s1_at	Transcript	weakly similar to ( 115)AT5G15230| Symbols: GASA4 | GASA4 (GAST1 PROTEIN HOMOLOG 4) | chr5:4945289-4946028 FORWARDVAR1 COG5048 gb|BQ805612;	-1.086
17.7.1.2	hormone metabolism.jasmonate.synthesis-degradation.lipoxygenase	ta.22828.2.s1_at	Transcript	moderately similar to ( 371)AT3G22400| Symbols: LOX5 | LOX5; lipoxygenase | chr3:7927018-7931174 FORWARDmoderately similar to ( 473)LOX2_ORYSA gb|CD934725;	-2.47
17.7.1.2	hormone metabolism.jasmonate.synthesis-degradation.lipoxygenase	ta.23763.1.s1_at	Transcript	highly similar to ( 637)AT3G22400| Symbols: LOX5 | LOX5; lipoxygenase | chr3:7927018-7931174 FORWARDhighly similar to ( 757)LOX1_ORYSA gb|CK213159;	1.822

## Sheet: Photosynthesis
BinCode	BinName	id	type	description	log2FC
1.1.1.2	PS.lightreaction.photosystem II.PSII polypeptide subunits	taaffx.28455.1.s1_at	Transcript	moderately similar to ( 214)ATCG00270| Symbols: PSBD | PSII D2 protein | chrC:32711-33772 FORWARDmoderately similar to ( 217)PSBD_SECCE gb|CA659945;	-1.566
1.1.1.2	PS.lightreaction.photosystem II.PSII polypeptide subunits	taaffx.128757.1.s1_at	Transcript	moderately similar to ( 314)ATCG00020| Symbols: PSBA | Encodes chlorophyll binding protein D1, a part of the photosystem II reaction center core | chrC:383-1444 REVERSEmoderately similar to ( 318)PSBA_WHEAT gb|CA692424;	-1.09
1.1.2.2	PS.lightreaction.photosystem I.PSI polypeptide subunits	taaffx.12631.1.s1_at	Transcript	moderately similar to ( 337)ATCG00340| Symbols: PSAB | Encodes the D1 subunit of photosystem I and II reaction centers. | chrC:37375-39579 REVERSEmoderately similar to ( 351)PSAB_WHEAT gb|BJ248421;	-1.566
1.1.2.2	PS.lightreaction.photosystem I.PSI polypeptide subunits	taaffx.142789.1.s1_at	Transcript	weakly similar to ( 140)ATCG00350| Symbols: PSAA | Encodes psaA protein comprising the reaction center for photosystem I along with psaB protein; hydrophobic protein encoded by the chloroplast genome. | chrC:39605-41857 REVERSEweakly similar to ( 140)PSAA_WHEAT gb|CA671900;	-1.417
1.1.4	PS.lightreaction.ATP synthase	taaffx.4530.2.s1_at	Transcript	moderately similar to ( 229)ATCG00120| Symbols: ATPA | Encodes the ATPase alpha subunit, which is a subunit of ATP synthase and part of the CF1 portion which catalyzes the conversion of ADP to ATP using the proton motive force. This complex is located in the thylakoid membrane of the chloroplast. | chrC:9938-11461 REVERSEmoderately similar to ( 245)ATPA_WHEAT gb|CA685580;	-1.197
1.1.4	PS.lightreaction.ATP synthase	taaffx.128473.1.a1_s_at	Transcript	weakly similar to ( 161)ATCG00480| Symbols: ATPB | chloroplast-encoded gene for beta subunit of ATP synthase | chrC:52660-54156 REVERSEweakly similar to ( 167)ATPB_WHEAT gb|CB412210;	-1.241
1.1.4	PS.lightreaction.ATP synthase	taaffx.4530.3.s1_s_at	Transcript	weakly similar to ( 135)ATCG00120| Symbols: ATPA | Encodes the ATPase alpha subunit, which is a subunit of ATP synthase and part of the CF1 portion which catalyzes the conversion of ADP to ATP using the proton motive force. This complex is located in the thylakoid membrane of the chloroplast. | chrC:9938-11461 REVERSEweakly similar to ( 157)ATPA_WHEAT gb|CA599282;	-1.077
1.1.6	PS.lightreaction.NADH DH	taaffx.81858.1.s1_at	Transcript	weakly similar to ( 108)ATCG01050| Symbols: NDHD | Represents a plastid-encoded subunit of a NAD(P)H dehydrogenase complex. Its mRNA is edited at four positions. Translation data is not available for this gene. | chrC:115665-117185 REVERSEweakly similar to ( 121)NU4C_WHEAT gb|CA680994;	1.053
1.2.4	PS.photorespiration.glycine cleavage	ta.2304.1.s1_at	Transcript	weakly similar to ( 188)AT2G35120| Symbols: | glycine cleavage system H protein, mitochondrial, putative | chr2:14812992-14814353 REVERSEweakly similar to ( 166)GCSH_FLAPR gb|CD932249;	-1.301
1.3.2	PS.calvin cyle.rubisco small subunit	taaffx.52923.1.s1_at	Transcript	very weakly similar to (81.3)RBS2_WHEAT gb|CA698913;	-1.176
1.3.8	PS.calvin cyle.transketolase	ta.5904.2.s1_at	Transcript	moderately similar to ( 476)AT2G45290| Symbols: | transketolase, putative | chr2:18679811-18682663 FORWARDmoderately similar to ( 485)TKTC_SOLTU gb|BJ293768;	-1.548
1.3.8	PS.calvin cyle.transketolase	ta.5904.1.s1_at	Transcript	weakly similar to ( 161)AT2G45290| Symbols: | transketolase, putative | chr2:18679811-18682663 FORWARDweakly similar to ( 169)TKTC_MAIZE gb|BJ299578;	-2.175

## Sheet: Cell_wall
BinCode	BinName	id	type	description	log2FC
10.2.1	cell wall.cellulose synthesis.cellulose synthase	taaffx.60291.1.s1_at	Transcript	moderately similar to ( 357)AT4G32410| Symbols: CESA1, RSW1 | CESA1 (CELLULOSE SYNTHASE 1); transferase, transferring glycosyl groups | chr4:15641015-15646394 REVERSE gb|BJ303140;	-1.041
10.6.1	cell wall.degradation.cellulases and beta -1,4-glucanases	taaffx.7177.1.s1_s_at	Transcript	weakly similar to ( 168)AT5G20950| Symbols: | glycosyl hydrolase family 3 protein | chr5:7107611-7110777 REVERSE gb|CA694274;	-1.651
10.6.3	cell wall.degradation.pectate lyases and polygalacturonases	ta.28090.2.s1_a_at	Transcript	very weakly similar to (91.3)AT3G61490| Symbols: | glycoside hydrolase family 28 protein / polygalacturonase (pectinase) family protein | chr3:22769414-22771112 FORWARD gb|CA599290;	-1.036
10.7	cell wall.modification	ta.28244.1.a1_s_at	Transcript	weakly similar to ( 120)AT4G25810| Symbols: XTH23, XTR6 | XTR6 (XYLOGLUCAN ENDOTRANSGLYCOSYLASE 6); hydrolase, acting on glycosyl bonds | chr4:13128703-13129724 FORWARDweakly similar to ( 112)BRU1_SOYBN gb|CA631663;	-1.054
10.7	cell wall.modification	ta.20221.1.s1_at	Transcript	very weakly similar to (83.6)AT1G20190| Symbols: EXP11, ATEXP11, ATHEXP ALPHA 1.14, ATEXPA11 | ATEXPA11 (ARABIDOPSIS THALIANA EXPANSIN A11) | chr1:6998753-6999701 REVERSEweakly similar to ( 102)EXPA1_ORYSA gb|CA637685;	-1.364
10.8.1	cell wall.pectin*esterases.PME	ta.15826.1.a1_at	Transcript	very weakly similar to (92.0)AT3G43270| Symbols: | pectinesterase family protein | chr3:15233390-15236112 REVERSEvery weakly similar to (88.2)PME_PRUPE gb|CA497753;	-1.552

## Sheet: Mitoch_transport
BinCode	BinName	id	type	description	log2FC
9.6	mitochondrial electron transport / ATP synthesis.cytochrome c	ta.6638.1.a1_at	Transcript	very weakly similar to (96.7)ATMG00960| Symbols: CCB203 | Encodes a protein of the mitochondrial membrane which has been shown to be present in a number of unidentified complexes including a 500-KDa complex postulated to have heme lyase activity, in which another protein (AtCCMH, AT1G15220) is also involved. cytochrome c biogenesis orf203. | chrM:256865-257476 REVERSEvery weakly similar to (86.3)…	-1.216

## Sheet: Metal_handling
BinCode	BinName	id	type	description	log2FC
15.2	metal handling.binding, chelation and storage	ta.24550.2.s1_at	Transcript	weakly similar to ( 102)AT5G63530| Symbols: ATFP3 | ATFP3 (Arabidopsis thaliana farnesylated protein 3) | chr5:25450649-25452840 FORWARD gb|CD906571;	-1.152
15.2	metal handling.binding, chelation and storage	ta.2799.1.s1_x_at	Transcript	very weakly similar to (96.3)EC1_WHEAT gb|CD906539;	-2.539
15.2	metal handling.binding, chelation and storage	ta.5549.3.s1_at	Transcript	weakly similar to ( 146)NAS1_HORVU gb|CD878292;	-1.291

## Sheet: Biodegradation_xenob
BinCode	BinName	id	type	description	log2FC
24.2	Biodegradation of Xenobiotics.lactoylglutathione lyase	ta.20582.1.s1_x_at	Transcript	weakly similar to ( 164)AT1G07645| Symbols: | lactoylglutathione lyase family protein / glyoxalase I family protein | chr1:2367609-2368346 REVERSE gb|BJ296527;	-1.605
24.2	Biodegradation of Xenobiotics.lactoylglutathione lyase	ta.20582.1.s1_a_at	Transcript	weakly similar to ( 164)AT1G07645| Symbols: | lactoylglutathione lyase family protein / glyoxalase I family protein | chr1:2367609-2368346 REVERSE gb|BJ296527;	-2.561
24.2	Biodegradation of Xenobiotics.lactoylglutathione lyase	ta.20582.2.s1_x_at	Transcript	weakly similar to ( 175)AT1G07645| Symbols: | lactoylglutathione lyase family protein / glyoxalase I family protein | chr1:2367609-2368346 REVERSE gb|CD915945;	-1.864

## Sheet: Stress
BinCode	BinName	id	type	description	log2FC
Biotic
20.1	stress.biotic	ta.22732.1.s1_s_at	Transcript	weakly similar to ( 115)WIR1A_WHEAT gb|CA666957;	1.217
20.1	stress.biotic	ta.27389.2.s1_x_at	Transcript	weakly similar to ( 107)THG2_WHEAT gb|BJ297034;	-1.005
20.1	stress.biotic	ta.13256.1.a1_x_at	Transcript	very weakly similar to (99.8)AT1G18250| Symbols: ATLP-1 | ATLP-1 (Arabidopsis thaumatin-like protein 1) | chr1:6277017-6277998 REVERSEvery weakly similar to (82.4)TP1A_MALDO gb|CD454115;	-1.774
20.1	stress.biotic	ta.2278.2.s1_a_at	Transcript	moderately similar to ( 288)AT2G43590| Symbols: | chitinase, putative | chr2:18088669-18089826 REVERSEmoderately similar to ( 300)CHIA_MAIZECOG5048 VAR1 gb|CK196331;	-1.013
20.1	stress.biotic	ta.13256.2.s1_x_at	Transcript	weakly similar to ( 167)AT1G18250| Symbols: ATLP-1 | ATLP-1 (Arabidopsis thaumatin-like protein 1) | chr1:6277017-6277998 REVERSEweakly similar to ( 136)TP1A_MALDOVAR1 gb|CK193207;	-1.158
20.1	stress.biotic	ta.13256.1.a1_a_at	Transcript	very weakly similar to (99.8)AT1G18250| Symbols: ATLP-1 | ATLP-1 (Arabidopsis thaumatin-like protein 1) | chr1:6277017-6277998 REVERSEvery weakly similar to (82.4)TP1A_MALDO gb|CD454115;	-1.313
20.1	stress.biotic	ta.13256.2.s1_at	Transcript	weakly similar to ( 167)AT1G18250| Symbols: ATLP-1 | ATLP-1 (Arabidopsis thaumatin-like protein 1) | chr1:6277017-6277998 REVERSEweakly similar to ( 136)TP1A_MALDOVAR1 gb|CK193207;	-1.113
20.1.7	stress.biotic.PR-proteins	ta.25549.1.s1_at	Transcript	weakly similar to ( 132)AT3G07040| Symbols: RPS3, RPM1 | RPM1 (RESISTANCE TO P. SYRINGAE PV MACULICOLA 1); protein binding | chr3:2226250-2229030 REVERSE gb|CK163901;	1.306
Abiotic
20.2.1	stress.abiotic.heat	ta.21910.2.s1_at	Transcript	very weakly similar to (90.5)AT5G59720| Symbols: | HSP18.2 (HEAT SHOCK PROTEIN 18.2) | chr5:24079858-24080343 FORWARDvery weakly similar to (83.2)HSP12_MEDSA gb|CA708152;	-3.015
20.2.2	stress.abiotic.cold	taaffx.128796.1.s1_at	Transcript	weakly similar to ( 157)AT3G17020| Symbols: | universal stress protein (USP) family protein | chr3:5802734-5804069 REVERSE gb|CK196726;	1.256
20.2.4	stress.abiotic.touch/wounding	ta.641.1.s1_at	Transcript	moderately similar to ( 268)AT1G19660| Symbols: | wound-responsive family protein | chr1:6800352-6802231 REVERSE gb|BG906659;	-1.043
20.2.99	stress.abiotic.unspecified	ta.3361.2.s1_x_at	Transcript	weakly similar to ( 103)AT1G24020| Symbols: MLP423 | MLP423 (MLP-LIKE PROTEIN 423) | chr1:8500642-8501447 REVERSE gb|BJ274638;	-1.37
20.2.99	stress.abiotic.unspecified	ta.3361.1.s1_at	Transcript	very weakly similar to (94.4)AT1G24020| Symbols: MLP423 | MLP423 (MLP-LIKE PROTEIN 423) | chr1:8500642-8501447 REVERSE gb|CK216297;	-1.156
20.2.99	stress.abiotic.unspecified	ta.3361.1.s1_x_at	Transcript	very weakly similar to (94.4)AT1G24020| Symbols: MLP423 | MLP423 (MLP-LIKE PROTEIN 423) | chr1:8500642-8501447 REVERSE gb|CK216297;	-1.308

## Sheet: Cell
BinCode	BinName	id	type	description	log2FC
Cell_Organization
31.1	cell.organisation	ta.18239.2.s1_a_at	Transcript	very weakly similar to (82.8)AT5G59880| Symbols: ADF3 | ADF3 (ACTIN DEPOLYMERIZING FACTOR 3); actin binding | chr5:24137608-24138854 FORWARDvery weakly similar to (86.7)ADF3_MAIZE gb|CA701017;	-1.22
31.4	cell.vesicle transport	ta.10236.1.a1_at	Transcript	very weakly similar to (85.1)AT2G45140| Symbols: | vesicle-associated membrane protein, putative / VAMP, putative | chr2:18618104-18620046 FORWARD gb|CK205521;	2.16
31.4	cell.vesicle transport	ta.7311.3.s1_a_at	Transcript	weakly similar to ( 135)AT3G60600| Symbols: VAP, (AT)VAP, VAP27, VAP27-1 | VAP27-1 (VAMP/SYNAPTOBREVIN-ASSOCIATED PROTEIN 27-1) | chr3:22411512-22412644 FORWARD gb|CA639744;	-1.485
Cell_transport
34.2	transporter.sugars	taaffx.141492.1.s1_at	Transcript	weakly similar to ( 119)AT1G75220| Symbols: | integral membrane protein, putative | chr1:28233073-28236267 REVERSE gb|CA633696;	-1.017
34.3	transport.amino acids	ta.28479.1.s1_at	Transcript	weakly similar to ( 177)AT5G40780| Symbols: LTH1, LHT1 | LHT1 (LYSINE HISTIDINE TRANSPORTER 1); amino acid transmembrane transporter | chr5:16341051-16344310 FORWARDCOG5048 gb|BJ286275;	1.036
34.16	transport.ABC transporters and multidrug resistance systems	taaffx.113404.1.s1_at	Transcript	weakly similar to ( 146)AT2G36380| Symbols: PDR6, ATPDR6 | ATPDR6/PDR6 (PLEIOTROPIC DRUG RESISTANCE 6); ATPase, coupled to transmembrane movement of substances | chr2:15264662-15270706 FORWARDweakly similar to ( 142)PDR1_TOBAC gb|CA613417;	-1.25
34.16	transport.ABC transporters and multidrug resistance systems	ta.10541.1.s1_at	Transcript	weakly similar to ( 189)AT1G10680| Symbols: PGP10 | PGP10 (P-GLYCOPROTEIN 10); ATPase, coupled to transmembrane movement of substances | chr1:3538471-3543783 REVERSEweakly similar to ( 159)MDR_ORYSA gb|BQ165939;	-1.08
34.16	transport.ABC transporters and multidrug resistance systems	ta.505.1.a1_at	Transcript	moderately similar to ( 305)AT1G79600| Symbols: | ABC1 family protein | chr1:29954998-29957409 REVERSE gb|CA737906;	-2.78
34.16	transport.ABC transporters and multidrug resistance systems	taaffx.113701.1.s1_s_at	Transcript	very weakly similar to (87.8)PDR4_ORYSA gb|CA606782;	1.074
34.99	transport.misc	ta.28555.2.s1_at	Transcript	weakly similar to ( 191)AT1G04560| Symbols: | AWPM-19-like membrane family protein | chr1:1245069-1245887 FORWARD gb|BJ290445;	-1.175
34.99	transport.misc	ta.28555.1.s1_at	Transcript	weakly similar to ( 167)AT1G04560| Symbols: | AWPM-19-like membrane family protein | chr1:1245069-1245887 FORWARD gb|BQ166465;	-1.23
34.99	transport.misc	ta.28555.3.s1_at	Transcript	moderately similar to ( 205)AT1G04560| Symbols: | AWPM-19-like membrane family protein | chr1:1245069-1245887 FORWARD gb|CD904599;	-2.197
34.99	transport.misc	ta.28555.3.s1_x_at	Transcript	moderately similar to ( 205)AT1G04560| Symbols: | AWPM-19-like membrane family protein | chr1:1245069-1245887 FORWARD gb|CD904599;	-1.387
34.99	transport.misc	ta.14259.1.s1_at	Transcript	weakly similar to ( 185)AT1G04560| Symbols: | AWPM-19-like membrane family protein | chr1:1245069-1245887 FORWARD gb|BJ300061;	-1.498
Cell_development
33.2	development.late embryogenesis abundant	taaffx.110973.1.s1_at	Transcript	gb|CA649435;	-1.55
33.2	development.late embryogenesis abundant	ta.5913.1.s1_at	Transcript	weakly similar to ( 139)AT3G15670| Symbols: | late embryogenesis abundant protein, putative / LEA protein, putative | chr3:5310148-5310908 REVERSEweakly similar to ( 194)LEA1_HORVU gb|CD924673;	-1.152
33.2	development.late embryogenesis abundant	ta.23659.1.s1_at	Transcript	very weakly similar to ( 100)AT1G52690| Symbols: | late embryogenesis abundant protein, putative / LEA protein, putative | chr1:19623510-19624257 FORWARDweakly similar to ( 180)LEA1_HORVU gb|AY148491.1;	-1.302
33.2	development.late embryogenesis abundant	ta.29375.1.s1_at	Transcript	weakly similar to ( 152)AT3G22490| Symbols: | late embryogenesis abundant protein, putative / LEA protein, putative | chr3:7969792-7970745 REVERSEweakly similar to ( 153)LEA34_GOSHI gb|CD923033;	-1.161
33.2	development.late embryogenesis abundant	ta.13396.1.s1_at	Transcript	gb|BQ579546;	-3.192
33.2	development.late embryogenesis abundant	ta.5888.1.s1_s_at	Transcript	gb|BQ807116;	-3.892
33.99	development.unspecified	ta.25342.1.s1_at	Transcript	weakly similar to ( 108)AT2G42840| Symbols: PDF1 | PDF1 (PROTODERMAL FACTOR 1) | chr2:17833404-17834503 REVERSECOG3883 gb|BQ170230;	-1.902
33.99	development.unspecified	ta.21394.1.s1_at	Transcript	weakly similar to ( 105)AT2G42840| Symbols: PDF1 | PDF1 (PROTODERMAL FACTOR 1) | chr2:17833404-17834503 REVERSEVAR1 COG5048 gb|BJ215681;	-4.562
33.99	development.unspecified	ta.25342.1.s1_x_at	Transcript	weakly similar to ( 108)AT2G42840| Symbols: PDF1 | PDF1 (PROTODERMAL FACTOR 1) | chr2:17833404-17834503 REVERSECOG3883 gb|BQ170230;	-1.959
33.99	development.unspecified	ta.8277.1.a1_at	Transcript	weakly similar to ( 180)AT5G07050| Symbols: | nodulin MtN21 family protein | chr5:2191534-2193417 REVERSE gb|BQ161684;	1.046
33.99	development.unspecified	taaffx.84069.1.s1_at	Transcript	very weakly similar to (87.4)AT1G75900| Symbols: | family II extracellular lipase 3 (EXL3) | chr1:28502840-28504604 FORWARD gb|CA645540;	-3.618
Cell_regulation
30.2.4	signalling.receptor kinases.leucine rich repeat IV	taaffx.4501.3.s1_at	Transcript	very weakly similar to (80.9)AT4G26540| Symbols: | protein kinase family protein | chr4:13394680-13398034 REVERSE gb|CA737866;	1.016
30.2.7	signalling.receptor kinases.leucine rich repeat VII	taaffx.4501.3.s1_at	Transcript	very weakly similar to (80.9)AT4G26540| Symbols: | protein kinase family protein | chr4:13394680-13398034 REVERSE gb|CA737866;	1.016
30.2.11	signalling.receptor kinases.leucine rich repeat XI	taaffx.4501.3.s1_at	Transcript	very weakly similar to (80.9)AT4G26540| Symbols: | protein kinase family protein | chr4:13394680-13398034 REVERSE gb|CA737866;	1.016
30.2.11	signalling.receptor kinases.leucine rich repeat XI	ta.20516.1.s1_x_at	Transcript	moderately similar to ( 209)AT5G06860| Symbols: PGIP1 | PGIP1 (POLYGALACTURONASE INHIBITING PROTEIN 1); protein binding | chr5:2132374-2133435 FORWARDweakly similar to ( 172)PGIP3_PHAVU gb|CA635174;	-1.696
30.2.12	signalling.receptor kinases.leucine rich repeat XII	taaffx.53376.1.s1_at	Transcript	weakly similar to ( 121)AT3G47570| Symbols: | leucine-rich repeat transmembrane protein kinase, putative | chr3:17538596-17541733 FORWARD gb|CA747224;	1.271
30.2.12	signalling.receptor kinases.leucine rich repeat XII	ta.12127.1.a1_at	Transcript	very weakly similar to (84.3)AT2G24130| Symbols: | leucine-rich repeat transmembrane protein kinase, putative | chr2:10265228-10268300 FORWARD gb|AJ611109;	1.041
30.2.20	signalling.receptor kinases.wheat LRK10 like	taaffx.77769.1.s1_at	Transcript	very weakly similar to (93.2)AT1G66910| Symbols: | protein kinase, putative | chr1:24965297-24967604 REVERSE gb|CA744488;	1.234
30.3	signalling.calcium	ta.23807.10.s1_x_at	Transcript	weakly similar to ( 154)AT5G62390| Symbols: ATBAG7 | ATBAG7 (ARABIDOPSIS THALIANA BCL-2-ASSOCIATED ATHANOGENE 7); calmodulin binding | chr5:25069603-25071396 REVERSE gb|BJ272735;	-1.232
30.3	signalling.calcium	ta.6558.1.s1_x_at	Transcript	weakly similar to ( 145)AT3G22190| Symbols: IQD5 | IQD5 (IQ-domain 5); calmodulin binding | chr3:7831668-7833519 REVERSE VAR1 COG5048 PRK08581 COG4886 COG5099 MopB_Res-Cmplx1_Nad11-M gb|CK208447;	-1.13
30.5	signalling.G-proteins	ta.10235.1.s1_at	Transcript	weakly similar to ( 134)AT5G41940| Symbols: | RabGAP/TBC domain-containing protein | chr5:16799267-16802679 FORWARD gb|BJ246114;	1.669

[truncated: 5 more sheets: Enzymes, Protein, RNA, DNA, Unknown]
