# Supplementary material for: Transcriptome Profiling of Wheat Seedlings following Treatment with Ultrahigh Diluted Arsenic Trioxide
Source: Evid Based Complement Alternat Med. 2014 Nov 27;2014:851263. doi: 10.1155/2014/851263 (PMC4265686; doi:10.1155/2014/851263)
Supplement: Supplementary file 1 — Complete dataset of up- and down-regulated gene sequences, resulting from MapMan analysis, in the four pairwise comparisons. Table S1: poisoned versus control (P+0 vs C+0); Table S2: poisoned-treated versus control (P+T vs C+0); Table S3: treated control versus control (C+T vs C+0); Table S4: poisoned-treated versus poisoned (P+T vs P+0). [file 851263.f1.zip › 851263.f1/Table S4.xls]

## Sheet: Primary_met
BinCode	BinName	id	type	description	log2FC
AA_metabolism
13.1.1.3.11	amino acid metabolism.synthesis.central amino acid metabolism.alanine.alanine-glyoxylate aminotransferase	ta.6723.3.s1_a_at	Transcript	moderately similar to ( 342)AT4G39660| Symbols: AGT2 | AGT2 (ALANINE:GLYOXYLATE AMINOTRANSFERASE 2); alanine-glyoxylate transaminase | chr4:18406791-18409256 FORWARD gb|BF474804;	-1.177
13.1.1.3.11	amino acid metabolism.synthesis.central amino acid metabolism.alanine.alanine-glyoxylate aminotransferase	taaffx.6001.1.s1_s_at	Transcript	weakly similar to ( 118)AT2G13360| Symbols: AGT1, AGT | AGT (ALANINE:GLYOXYLATE AMINOTRANSFERASE) | chr2:5546499-5547984 REVERSE gb|CA693623;	-1.023
13.1.2.3	amino acid metabolism.synthesis.glutamate family.arginine	taaffx.82909.1.s1_at	Transcript	gb|CA665054;	-1.403
13.1.3.1	amino acid metabolism.synthesis.aspartate family.asparagine	ta.5645.1.s1_x_at	Transcript	moderately similar to ( 485)AT5G65010| Symbols: ASN2 | ASN2 (ASPARAGINE SYNTHETASE 2); asparagine synthase (glutamine-hydrolyzing) | chr5:25986450-25989504 FORWARDhighly similar to ( 516)ASNS_MAIZE gb|CA609920;	-1.535
13.1.3.1	amino acid metabolism.synthesis.aspartate family.asparagine	ta.5645.2.s1_x_at	Transcript	weakly similar to ( 153)AT5G10240| Symbols: ASN3 | ASN3 (ASPARAGINE SYNTHETASE 3); asparagine synthase (glutamine-hydrolyzing) | chr5:3212935-3216419 REVERSEweakly similar to ( 156)ASNS_ASPOF gb|CA707112;	-1.285
13.1.3.1	amino acid metabolism.synthesis.aspartate family.asparagine	ta.5645.2.s1_at	Transcript	weakly similar to ( 153)AT5G10240| Symbols: ASN3 | ASN3 (ASPARAGINE SYNTHETASE 3); asparagine synthase (glutamine-hydrolyzing) | chr5:3212935-3216419 REVERSEweakly similar to ( 156)ASNS_ASPOF gb|CA707112;	-1.64
13.1.3.4	amino acid metabolism.synthesis.aspartate family.methionine	taaffx.57475.1.s1_x_at	Transcript	moderately similar to ( 201)AT4G01850| Symbols: SAM-2, MAT2 | MAT2/SAM-2 (S-adenosylmethionine synthetase 2) | chr4:796298-797479 REVERSEmoderately similar to ( 208)METL_ORYSA gb|CA628517;	-1.372
13.1.3.5	amino acid metabolism.synthesis.aspartate family.lysine	ta.152.1.s1_at	Transcript	moderately similar to ( 494)AT2G45440| Symbols: DHDPS2 | DHDPS2 (DIHYDRODIPICOLINATE SYNTHASE); dihydrodipicolinate synthase | chr2:18738368-18739941 FORWARDhighly similar to ( 661)DAPA2_WHEAT gb|M60599.1;	-1.506
13.1.4.1.4	amino acid metabolism.synthesis.branched chain group.common.branched-chain amino acid aminotransferase	taaffx.129191.1.s1_at	Transcript	weakly similar to ( 130)AT5G65780| Symbols: ATBCAT-5 | ATBCAT-5; branched-chain-amino-acid transaminase/ catalytic | chr5:26333644-26335811 FORWARD gb|CD906345;	-1.28
13.1.5.1.1	amino acid metabolism.synthesis.serine-glycine-cysteine group.serine.phosphoglycerate dehydrogenase	ta.24650.2.a1_a_at	Transcript	moderately similar to ( 301)AT4G34200| Symbols: EDA9 | EDA9 (embryo sac development arrest 9); NAD binding / amino acid binding / binding / catalytic/ cofactor binding / oxidoreductase, acting on the CH-OH group of donors, NAD or NADP as acceptor / phosphoglycerate dehydrogenase | chr4:16374045-16376565 REVERSE gb|BJ320120;	-1.42
13.1.6.5.4	amino acid metabolism.synthesis.aromatic aa.tryptophan.indole-3-glycerol phosphate synthase	taaffx.123181.1.s1_at	Transcript	very weakly similar to (82.4)AT5G48220| Symbols: | indole-3-glycerol phosphate synthase, putative | chr5:19567665-19569272 FORWARD gb|BE426396;	-1.34
13.1.6.5.5	amino acid metabolism.synthesis.aromatic aa.tryptophan.tryptophan synthase	ta.29424.1.a1_a_at	Transcript	weakly similar to ( 166)AT4G02610| Symbols: | tryptophan synthase, alpha subunit, putative | chr4:1147662-1149217 FORWARDweakly similar to ( 177)TRPA_MAIZE gb|CK205869;	-1.26
13.1.6.5.5	amino acid metabolism.synthesis.aromatic aa.tryptophan.tryptophan synthase	ta.10688.1.s1_at	Transcript	weakly similar to ( 186)AT4G02610| Symbols: | tryptophan synthase, alpha subunit, putative | chr4:1147662-1149217 FORWARDmoderately similar to ( 259)TRPA_MAIZE gb|AB094060.1;	-1.124
13.1.6.5.5	amino acid metabolism.synthesis.aromatic aa.tryptophan.tryptophan synthase	ta.27090.1.s1_at	Transcript	moderately similar to ( 376)AT4G27070| Symbols: TSB2 | TSB2 (TRYPTOPHAN SYNTHASE BETA-SUBUNIT); tryptophan synthase | chr4:13586570-13588625 FORWARDmoderately similar to ( 394)TRPB2_MAIZE gb|BT009279.1;	3.532
13.2.6.3	amino acid metabolism.degradation.aromatic aa.tryptophan	ta.25580.1.s1_at	Transcript	moderately similar to ( 252)AT4G16800| Symbols: | enoyl-CoA hydratase, putative | chr4:9454950-9456328 REVERSEVAR1 gb|BJ228692;	-1.189
Fermentation
TCA -transformation
8.1.3	TCA / org. transformation.TCA.aconitase	taaffx.6397.1.s1_s_at	Transcript	weakly similar to ( 117)AT4G26970| Symbols: | aconitate hydratase, cytoplasmic, putative / citrate hydro-lyase/aconitase, putative | chr4:13543083-13548433 FORWARDweakly similar to ( 117)ACOC_ORYSA gb|CA686614;	-1.063
8.2.10	TCA / org. transformation.other organic acid transformaitons.malic	ta.7720.2.s1_a_at	Transcript	weakly similar to ( 164)AT2G13560| Symbols: | malate oxidoreductase, putative | chr2:5657171-5662185 FORWARDweakly similar to ( 164)MAOM_SOLTU gb|CA609004;	-1.137
8.2.11	TCA / org. transformation.other organic acid transformaitons.atp-citrate lyase	taaffx.27287.1.s1_s_at	Transcript	weakly similar to ( 103)AT1G09430| Symbols: ACLA-3 | ACLA-3 (ATP-citrate lyase A-3) | chr1:3042137-3044980 FORWARD gb|CA678789;	-1.191
8.3	TCA / org. transformation.carbonic anhydrases	ta.4868.1.s1_x_at	Transcript	weakly similar to ( 157)AT1G08080| Symbols: | carbonic anhydrase family protein | chr1:2517019-2518543 REVERSE gb|CN011015;	-1.893
8.3	TCA / org. transformation.carbonic anhydrases	ta.4868.1.s1_a_at	Transcript	weakly similar to ( 157)AT1G08080| Symbols: | carbonic anhydrase family protein | chr1:2517019-2518543 REVERSE gb|CN011015;	-1.867
CHO
2.1.2.2	major CHO metabolism.synthesis.starch.starch synthase	ta.25528.2.s1_at	Transcript	moderately similar to ( 257)AT1G11720| Symbols: ATSS3 | ATSS3 (STARCH SYNTHASE 3); starch synthase/ transferase, transferring glycosyl groups | chr1:3952511-3956840 FORWARDmoderately similar to ( 277)SSY3_SOLTU gb|BJ271418;	-1.104
2.2.1.1	major CHO metabolism.degradation.sucrose.fructokinase	taaffx.131309.1.s1_at	Transcript	weakly similar to ( 163)AT4G10260| Symbols: | pfkB-type carbohydrate kinase family protein | chr4:6371482-6372766 REVERSEweakly similar to ( 199)SCRK2_ORYSA VAR1 gb|CK207459;	-1.038
2.2.1.3.1	major CHO metabolism.degradation.sucrose.invertases.neutral	taaffx.123812.1.s1_s_at	Transcript	weakly similar to ( 170)AT1G72000| Symbols: | beta-fructofuranosidase, putative / invertase, putative / saccharase, putative / beta-fructosidase, putative | chr1:27106939-27109325 FORWARD gb|CA658075;	-1.039
3.5	minor CHO metabolism.others	ta.810.3.s1_a_at	Transcript	very weakly similar to (91.3)AT5G15140| Symbols: | aldose 1-epimerase family protein | chr5:4908689-4910673 FORWARD gb|CA593572;	-1.173
Lipid_metabolism
11.1.4	lipid metabolism.FA synthesis and FA elongation.ACP oxoacyl reductase	ta.28922.1.s1_at	Transcript	weakly similar to ( 172)AT1G24360| Symbols: | 3-oxoacyl-(acyl-carrier protein) reductase, chloroplast / 3-ketoacyl-acyl carrier protein reductase | chr1:8640809-8643272 FORWARDweakly similar to ( 179)FABG4_BRANA gb|BQ487478;	-1.516
11.1.9	lipid metabolism.FA synthesis and FA elongation.long chain fatty acid CoA ligase	taaffx.34682.1.a1_at	Transcript	weakly similar to ( 181)AT3G05970| Symbols: LACS6 | LACS6 (LONG-CHAIN ACYL-COA SYNTHETASE 6) | chr3:1786516-1791752 REVERSE gb|BJ238421;	-1.129
11.1.9	lipid metabolism.FA synthesis and FA elongation.long chain fatty acid CoA ligase	taaffx.113953.1.s1_s_at	Transcript	moderately similar to ( 395)AT1G64400| Symbols: | long-chain-fatty-acid--CoA ligase, putative / long-chain acyl-CoA synthetase, putative | chr1:23919465-23923344 REVERSE gb|CD892451;	-1.577
11.1.31	lipid metabolism.FA synthesis and FA elongation.pyruvate DH	ta.4210.3.s1_at	Transcript	weakly similar to ( 163)AT2G34590| Symbols: | transketolase family protein | chr2:14576035-14577923 REVERSEweakly similar to ( 116)ODPB_MESVI gb|CA720335;	-1.26
11.1.31	lipid metabolism.FA synthesis and FA elongation.pyruvate DH	ta.4210.1.s1_a_at	Transcript	moderately similar to ( 241)AT1G30120| Symbols: PDH-E1 BETA | PDH-E1 BETA (PYRUVATE DEHYDROGENASE E1 BETA); pyruvate dehydrogenase (acetyl-transferring) | chr1:10584334-10586461 REVERSEweakly similar to ( 166)ODPB_MESVI gb|CK207542;	-1.273
11.3	lipid metabolism.Phospholipid synthesis	ta.6416.1.s1_at	Transcript	moderately similar to ( 447)AT2G38110| Symbols: ATGPAT6, GPAT6 | ATGPAT6/GPAT6 (GLYCEROL-3-PHOSPHATE ACYLTRANSFERASE 6); 1-acylglycerol-3-phosphate O-acyltransferase/ acyltransferase | chr2:15959894-15962442 REVERSEVAR1 COG5048 gb|CK154083;	-1.213
11.3.7	lipid metabolism.Phospholipid synthesis.cyclopropane-fatty-acyl-phospholipid synthase	ta.9664.1.a1_at	Transcript	weakly similar to ( 189)AT3G23510| Symbols: | cyclopropane fatty acid synthase, putative / CPA-FA synthase, putative | chr3:8428078-8433166 FORWARD gb|BQ483035;	-1.993
11.3.7	lipid metabolism.Phospholipid synthesis.cyclopropane-fatty-acyl-phospholipid synthase	taaffx.92408.1.s1_at	Transcript	moderately similar to ( 463)AT3G23510| Symbols: | cyclopropane fatty acid synthase, putative / CPA-FA synthase, putative | chr3:8428078-8433166 FORWARD gb|CF132877;	-1.75
11.3.7	lipid metabolism.Phospholipid synthesis.cyclopropane-fatty-acyl-phospholipid synthase	ta.8082.1.a1_x_at	Transcript	weakly similar to ( 157)AT3G23510| Symbols: | cyclopropane fatty acid synthase, putative / CPA-FA synthase, putative | chr3:8428078-8433166 FORWARDCOG5048 VAR1 gb|BQ161248;	1.411
11.6	lipid metabolism.lipid transfer proteins etc	taaffx.130058.1.s1_x_at	Transcript	very weakly similar to (88.6)AT5G59310| Symbols: LTP4 | LTP4 (LIPID TRANSFER PROTEIN 4); lipid binding | chr5:23942522-23942998 REVERSEweakly similar to ( 129)NLTP3_ORYSA gb|AJ611761;	-1.36
11.9.2	lipid metabolism.lipid degradation.lipases	ta.9749.1.a1_at	Transcript	very weakly similar to (88.2)AT2G31100| Symbols: | lipase, putative | chr2:13263815-13265251 REVERSE gb|BJ229752;	-1.423
11.9.2.1	lipid metabolism.lipid degradation.lipases.triacylglycerol lipase	taaffx.111785.1.s1_at	Transcript	moderately similar to ( 208)AT4G18550| Symbols: | lipase class 3 family protein | chr4:10225017-10226873 REVERSE gb|CA633761;	-1.025
11.9.2.1	lipid metabolism.lipid degradation.lipases.triacylglycerol lipase	ta.9749.3.s1_at	Transcript	very weakly similar to (80.1)AT4G18550| Symbols: | lipase class 3 family protein | chr4:10225017-10226873 REVERSE gb|BJ226041;	-1.362
11.9.2.1	lipid metabolism.lipid degradation.lipases.triacylglycerol lipase	ta.7740.1.a1_at	Transcript	weakly similar to ( 192)AT4G18550| Symbols: | lipase class 3 family protein | chr4:10225017-10226873 REVERSEVAR1 COG5048 gb|CK198840;	-1.352
11.9.4.9	lipid metabolism.lipid degradation.beta-oxidation.mutifunctional	taaffx.58857.1.s1_at	Transcript	weakly similar to ( 158)AT3G06860| Symbols: ATMPF2, MFP2 | MFP2 (MULTIFUNCTIONAL PROTEIN); enoyl-CoA hydratase | chr3:2161932-2166015 FORWARDweakly similar to ( 159)MFPA_BRANA gb|CA614158;	-1.469
11.9.4.9	lipid metabolism.lipid degradation.beta-oxidation.mutifunctional	taaffx.114853.1.s1_at	Transcript	moderately similar to ( 434)AT3G06860| Symbols: ATMPF2, MFP2 | MFP2 (MULTIFUNCTIONAL PROTEIN); enoyl-CoA hydratase | chr3:2161932-2166015 FORWARDmoderately similar to ( 448)MFPA_CUCSA gb|BJ291348;	-1.76
11.10.3	lipid metabolism.glycolipid synthesis.UDP-sulfoquinovose synthase	taaffx.65883.1.s1_at	Transcript	moderately similar to ( 333)AT4G33030| Symbols: SQD1 | SQD1 (sulfoquinovosyldiacylglycerol 1); UDPsulfoquinovose synthase | chr4:15936054-15937569 FORWARDmoderately similar to ( 329)SQD1_SPIOL gb|CA723891;	-1.472
Co-factors and vitamins
Nucleotides
23.1.1.10	nucleotide metabolism.synthesis.pyrimidine.CTP synthetase	ta.9435.2.s1_a_at	Transcript	moderately similar to ( 252)AT3G12670| Symbols: EMB2742 | EMB2742 (EMBRYO DEFECTIVE 2742); CTP synthase | chr3:4020358-4024093 REVERSE gb|BJ268479;	-1.186
23.1.2.20	nucleotide metabolism.synthesis.purine.adenylosuccinate synthase	ta.121.1.s1_at	Transcript	highly similar to ( 516)AT3G57610| Symbols: ATPURA | ATPURA; adenylosuccinate synthase | chr3:21345496-21347580 REVERSEhighly similar to ( 628)PURA_WHEATVAR1 COG5048 COG4886 COG5099 gb|U49387.1;	1.233
23.2	nucleotide metabolism.degradation	ta.27744.2.s1_a_at	Transcript	weakly similar to ( 177)AT3G04080| Symbols: ATAPY1 | ATAPY1 (APYRASE 1); calmodulin binding | chr3:1068075-1070924 REVERSEweakly similar to ( 188)NTPA_PEA gb|CA618050;	-1.072

## Sheet: Secondary_metab
BinCode	BinName	id	type	description	log2FC
16.2	secondary metabolism.phenylpropanoids	ta.7176.2.s1_x_at	Transcript	weakly similar to ( 103)ZRP4_MAIZEVAR1 COG5048 gb|CK196344;	-1.311
16.2	secondary metabolism.phenylpropanoids	ta.19357.1.s1_at	Transcript	weakly similar to ( 125)ZRP4_MAIZE gb|CB307103;	-1.999
16.2	secondary metabolism.phenylpropanoids	ta.5399.1.s1_a_at	Transcript	weakly similar to ( 135)ZRP4_MAIZECOG5048 gb|CK198328;	-2.906
16.2.1.1	secondary metabolism.phenylpropanoids.lignin biosynthesis.PAL	ta.7022.3.s1_at	Transcript	weakly similar to ( 150)AT3G53260| Symbols: PAL2 | PAL2 (phenylalanine ammonia-lyase 2); phenylalanine ammonia-lyase | chr3:19755234-19757597 REVERSEweakly similar to ( 190)PALY_WHEAT gb|BJ319555;	1.147
16.2.1.9	secondary metabolism.phenylpropanoids.lignin biosynthesis.COMT	ta.25295.1.s1_at	Transcript	moderately similar to ( 300)AT5G54160| Symbols: OMT1, ATOMT1 | ATOMT1 (O-METHYLTRANSFERASE 1) | chr5:21999301-22001393 FORWARDmoderately similar to ( 370)COMT1_MAIZE gb|CD373447;	-2.179
16.4.3	secondary metabolism.N misc.cyanogenic glycosides	taaffx.132143.1.s1_s_at	Transcript	very weakly similar to (86.3)AT3G23490| Symbols: CYN | CYN (CYANASE); cyanate hydratase | chr3:8423245-8424422 REVERSEvery weakly similar to (89.7)CYNS_ORYSA gb|CK212211;	1.117
16.8.2	secondary metabolism.flavonoids.chalcones	ta.7099.2.s1_at	Transcript	weakly similar to ( 106)AT5G13930| Symbols: CHS, TT4, ATCHS | ATCHS/CHS/TT4 (CHALCONE SYNTHASE); naringenin-chalcone synthase | chr5:4488764-4490037 FORWARDweakly similar to ( 121)CHS2_SECCE gb|BJ301775;	-1.049
16.8.2	secondary metabolism.flavonoids.chalcones	ta.9172.3.s1_x_at	Transcript	moderately similar to ( 238)AT5G13930| Symbols: CHS, TT4, ATCHS | ATCHS/CHS/TT4 (CHALCONE SYNTHASE); naringenin-chalcone synthase | chr5:4488764-4490037 FORWARDmoderately similar to ( 289)CHS2_SECCEVAR1 gb|CK204212;	-1.069
16.8.2	secondary metabolism.flavonoids.chalcones	ta.9172.3.s1_at	Transcript	moderately similar to ( 238)AT5G13930| Symbols: CHS, TT4, ATCHS | ATCHS/CHS/TT4 (CHALCONE SYNTHASE); naringenin-chalcone synthase | chr5:4488764-4490037 FORWARDmoderately similar to ( 289)CHS2_SECCEVAR1 gb|CK204212;	-1.048

## Sheet: Hormone_metab
BinCode	BinName	id	type	description	log2FC
17.1.3	hormone metabolism.abscisic acid.induced-regulated-responsive-activated	ta.2798.1.s1_x_at	Transcript	weakly similar to ( 114)AT2G40170| Symbols: ATEM6, GEA6 | ATEM6/GEA6 (ARABIDOPSIS EARLY METHIONINE-LABELLED 6) | chr2:16786870-16787245 REVERSEweakly similar to ( 152)EM1_WHEAT gb|BJ290016;	3.543
17.1.3	hormone metabolism.abscisic acid.induced-regulated-responsive-activated	ta.25025.1.s1_at	Transcript	weakly similar to ( 113)AT2G40170| Symbols: ATEM6, GEA6 | ATEM6/GEA6 (ARABIDOPSIS EARLY METHIONINE-LABELLED 6) | chr2:16786870-16787245 REVERSEweakly similar to ( 150)LE19A_HORVU gb|CD490538;	3.006
17.1.3	hormone metabolism.abscisic acid.induced-regulated-responsive-activated	ta.25025.1.s1_s_at	Transcript	weakly similar to ( 113)AT2G40170| Symbols: ATEM6, GEA6 | ATEM6/GEA6 (ARABIDOPSIS EARLY METHIONINE-LABELLED 6) | chr2:16786870-16787245 REVERSEweakly similar to ( 150)LE19A_HORVU gb|CD490538;	1.181
17.1.3	hormone metabolism.abscisic acid.induced-regulated-responsive-activated	ta.25025.1.s1_x_at	Transcript	weakly similar to ( 113)AT2G40170| Symbols: ATEM6, GEA6 | ATEM6/GEA6 (ARABIDOPSIS EARLY METHIONINE-LABELLED 6) | chr2:16786870-16787245 REVERSEweakly similar to ( 150)LE19A_HORVU gb|CD490538;	2.783
17.1.3	hormone metabolism.abscisic acid.induced-regulated-responsive-activated	ta.25025.2.s1_at	Transcript	weakly similar to ( 115)AT2G40170| Symbols: ATEM6, GEA6 | ATEM6/GEA6 (ARABIDOPSIS EARLY METHIONINE-LABELLED 6) | chr2:16786870-16787245 REVERSEweakly similar to ( 153)LE19A_HORVU gb|BQ579513;	1.003
17.2.2	hormone metabolism.auxin.signal transduction	ta.7558.3.s1_a_at	Transcript	moderately similar to ( 251)AT2G32410| Symbols: AXL | AXL (AXR1-LIKE); catalytic | chr2:13764779-13767361 FORWARD gb|BQ609768;	-1.236
17.3.1.2.3	hormone metabolism.brassinosteroid.synthesis-degradation.sterols.CYP51	taaffx.28047.1.s1_at	Transcript	very weakly similar to (97.4)AT1G11680| Symbols: EMB1738, CYP51A2, CYP51, CYP51G1 | CYP51G1 (CYTOCHROME P450 51); oxygen binding | chr1:3938925-3940585 FORWARDvery weakly similar to (95.1)CP51_SORBI gb|CA665990;	2.448
17.3.1.2.3	hormone metabolism.brassinosteroid.synthesis-degradation.sterols.CYP51	ta.9296.2.s1_a_at	Transcript	weakly similar to ( 165)AT1G11680| Symbols: EMB1738, CYP51A2, CYP51, CYP51G1 | CYP51G1 (CYTOCHROME P450 51); oxygen binding | chr1:3938925-3940585 FORWARDmoderately similar to ( 251)CP51_SORBI gb|AJ251798.1;	-1.039
17.5.1	hormone metabolism.ethylene.synthesis-degradation	ta.28233.1.s1_at	Transcript	moderately similar to ( 217)AT5G20400| Symbols: | oxidoreductase, 2OG-Fe(II) oxygenase family protein | chr5:6894873-6896187 FORWARDweakly similar to ( 153)FLS_SOLTU gb|CA599187;	1.56
17.5.2	hormone metabolism.ethylene.signal transduction	ta.2781.1.s1_at	Transcript	gb|AF376136.1;	1.05
17.5.3	hormone metabolism.ethylene.induced-regulated-responsive-activated	ta.9564.1.s1_x_at	Transcript	weakly similar to ( 134)AT3G11930| Symbols: | universal stress protein (USP) family protein | chr3:3776377-3777399 FORWARD gb|BJ288777;	1.42
17.5.3	hormone metabolism.ethylene.induced-regulated-responsive-activated	ta.9564.1.s1_at	Transcript	weakly similar to ( 134)AT3G11930| Symbols: | universal stress protein (USP) family protein | chr3:3776377-3777399 FORWARD gb|BJ288777;	1.973
17.6.3	hormone metabolism.gibberelin.induced-regulated-responsive-activated	ta.338.1.s1_at	Transcript	weakly similar to ( 120)AT3G10185| Symbols: | Encodes a Gibberellin-regulated GASA/GAST/Snakin family protein | chr3:3145584-3146204 FORWARD gb|BF484849;	-1.068
17.7.1.2	hormone metabolism.jasmonate.synthesis-degradation.lipoxygenase	ta.13650.1.a1_at	Transcript	weakly similar to ( 169)AT3G22400| Symbols: LOX5 | LOX5; lipoxygenase | chr3:7927018-7931174 FORWARDweakly similar to ( 177)LOX3_ORYSA gb|CK211830;	-1.015

## Sheet: Photosynthesis
BinCode	BinName	id	type	description	log2FC
1.1.1.2	PS.lightreaction.photosystem II.PSII polypeptide subunits	ta.28750.1.s1_x_at	Transcript	very weakly similar to (82.4)AT1G79040| Symbols: PSBR | PSBR (photosystem II subunit R) | chr1:29740978-29741674 FORWARDweakly similar to ( 140)PSBR_HORVU gb|CD884700;	1.248
1.1.2.2	PS.lightreaction.photosystem I.PSI polypeptide subunits	taaffx.12631.1.s1_at	Transcript	moderately similar to ( 337)ATCG00340| Symbols: PSAB | Encodes the D1 subunit of photosystem I and II reaction centers. | chrC:37375-39579 REVERSEmoderately similar to ( 351)PSAB_WHEAT gb|BJ248421;	-1.739
1.1.4	PS.lightreaction.ATP synthase	ta.9647.2.s1_at	Transcript	highly similar to ( 577)AT4G38510| Symbols: | (VACUOLAR ATP SYNTHASE SUBUNIT B2); hydrogen ion transporting ATP synthase, rotational mechanism | chr4:18011149-18014783 REVERSEhighly similar to ( 579)VATB1_GOSHIVAR1 gb|CK161429;	-1.089
1.1.40	PS.lightreaction.cyclic electron flow-chlororespiration	taaffx.128617.1.s1_x_at	Transcript	weakly similar to ( 195)ATCG01010| Symbols: NDHF | Chloroplast encoded NADH dehydrogenase unit. | chrC:110398-112638 REVERSEmoderately similar to ( 204)NU5C_LACSA gb|CA670913;	-1.024
1.3.1	PS.calvin cyle.rubisco large subunit	taaffx.128414.24.a1_s_at	Transcript	weakly similar to ( 116)ATCG00490| Symbols: RBCL | large subunit of RUBISCO. | chrC:54958-56397 FORWARDweakly similar to ( 115)RBL_SPIOL gb|CA722241;	1.176
1.3.8	PS.calvin cyle.transketolase	taaffx.78956.1.s1_at	Transcript	very weakly similar to ( 100)AT3G60750| Symbols: | transketolase, putative | chr3:22464979-22467799 FORWARDweakly similar to ( 103)TKTC_MAIZE gb|CA724299;	-1.032

## Sheet: Cell_wall
BinCode	BinName	id	type	description	log2FC
10.6.1	cell wall.degradation.cellulases and beta -1,4-glucanases	taaffx.7177.1.s1_x_at	Transcript	weakly similar to ( 168)AT5G20950| Symbols: | glycosyl hydrolase family 3 protein | chr5:7107611-7110777 REVERSE gb|CA694274;	-1.681
10.6.1	cell wall.degradation.cellulases and beta -1,4-glucanases	taaffx.7177.1.s1_s_at	Transcript	weakly similar to ( 168)AT5G20950| Symbols: | glycosyl hydrolase family 3 protein | chr5:7107611-7110777 REVERSE gb|CA694274;	-1.89
10.6.3	cell wall.degradation.pectate lyases and polygalacturonases	ta.14588.3.s1_x_at	Transcript	weakly similar to ( 107)PGIP1_ORYSA gb|CA718384;	-1.528
10.6.3	cell wall.degradation.pectate lyases and polygalacturonases	ta.14588.2.s1_x_at	Transcript	weakly similar to ( 142)AT5G06860| Symbols: PGIP1 | PGIP1 (POLYGALACTURONASE INHIBITING PROTEIN 1); protein binding | chr5:2132374-2133435 FORWARDmoderately similar to ( 310)PGIP1_ORYSA gb|CD930954;	-1.034
10.7	cell wall.modification	ta.20221.1.s1_at	Transcript	very weakly similar to (83.6)AT1G20190| Symbols: EXP11, ATEXP11, ATHEXP ALPHA 1.14, ATEXPA11 | ATEXPA11 (ARABIDOPSIS THALIANA EXPANSIN A11) | chr1:6998753-6999701 REVERSEweakly similar to ( 102)EXPA1_ORYSA gb|CA637685;	-1.128

## Sheet: Mitoch_transport
BinCode	BinName	id	type	description	log2FC
9.4	mitochondrial electron transport / ATP synthesis.alternative oxidase	ta.10549.1.a1_x_at	Transcript	very weakly similar to (80.9)AT3G22360| Symbols: AOX1B | AOX1B (alternative oxidase 1B); alternative oxidase | chr3:7904163-7905391 FORWARD gb|CA609877;	1.37
9.4	mitochondrial electron transport / ATP synthesis.alternative oxidase	ta.10549.1.a1_at	Transcript	very weakly similar to (80.9)AT3G22360| Symbols: AOX1B | AOX1B (alternative oxidase 1B); alternative oxidase | chr3:7904163-7905391 FORWARD gb|CA609877;	1.44

## Sheet: Metal_handling
BinCode	BinName	id	type	description	log2FC
15.2	metal handling.binding, chelation and storage	ta.2799.1.s1_x_at	Transcript	very weakly similar to (96.3)EC1_WHEAT gb|CD906539;	1.612

## Sheet: Biodegradation_xenob
BinCode	BinName	id	type	description	log2FC

## Sheet: Stress
BinCode	BinName	id	type	description	log2FC
Biotic
20.1	stress.biotic	ta.26340.1.a1_at	Transcript	weakly similar to ( 155)AT3G12500| Symbols: PR3, PR-3, CHI-B, B-CHI, ATHCHIB | ATHCHIB (BASIC CHITINASE); chitinase | chr3:3962508-3963952 REVERSEweakly similar to ( 173)CHIC_SECCE gb|CK198901;	1.946
20.1	stress.biotic	taaffx.108556.1.s1_at	Transcript	gb|CA692789;	1.002
20.1	stress.biotic	ta.23322.2.s1_at	Transcript	weakly similar to ( 190)AT4G11650| Symbols: ATOSM34 | ATOSM34 (OSMOTIN 34) | chr4:7025121-7026107 REVERSEmoderately similar to ( 220)ZEAM_MAIZE gb|CA640491;	1.224
20.1	stress.biotic	ta.27389.2.s1_x_at	Transcript	weakly similar to ( 107)THG2_WHEAT gb|BJ297034;	4.597
20.1	stress.biotic	ta.2784.1.a1_at	Transcript	weakly similar to ( 161)AT3G12500| Symbols: PR3, PR-3, CHI-B, B-CHI, ATHCHIB | ATHCHIB (BASIC CHITINASE); chitinase | chr3:3962508-3963952 REVERSEweakly similar to ( 180)CHIQ_TOBAC gb|AB029934.1;	1.239
20.1.1	stress.biotic.respiratory burst	ta.7051.1.a1_at	Transcript	weakly similar to ( 124)AT1G64060| Symbols: ATRBOHF, RBOHAP108, RBOHF, ATRBOH F | ATRBOH F (RESPIRATORY BURST OXIDASE PROTEIN F); NAD(P)H oxidase | chr1:23773929-23779980 FORWARD gb|CK159915;	-1.058
20.1.3	stress.biotic.signalling	ta.27345.1.s1_at	Transcript	moderately similar to ( 365)AT2G44110| Symbols: ATMLO15, MLO15 | MLO15 (MILDEW RESISTANCE LOCUS O 15); calmodulin binding | chr2:18252565-18255392 REVERSEmoderately similar to ( 252)MLOH1_ORYSA gb|CA745732;	1.109
20.1.7	stress.biotic.PR-proteins	ta.22687.1.a1_at	Transcript	very weakly similar to (94.4)AT1G58170| Symbols: | disease resistance-responsive protein-related / dirigent protein-related | chr1:21539853-21540410 FORWARD gb|CA696591;	1.026
Abiotic
20.2.1	stress.abiotic.heat	ta.6123.2.s1_at	Transcript	weakly similar to ( 191)AT2G32120| Symbols: HSP70T-2 | HSP70T-2; ATP binding | chr2:13658797-13660488 REVERSEvery weakly similar to (89.7)HSP7C_PETHY gb|BJ290998;	-1.547
20.2.1	stress.abiotic.heat	ta.12069.1.s1_at	Transcript	very weakly similar to (86.7)AT1G52560| Symbols: | 26.5 kDa class I small heat shock protein-like (HSP26.5-P) | chr1:19578452-19579435 REVERSE gb|AJ603360;	-1.147
20.2.1	stress.abiotic.heat	ta.14573.1.s1_at	Transcript	weakly similar to ( 102)AT5G59720| Symbols: | HSP18.2 (HEAT SHOCK PROTEIN 18.2) | chr5:24079858-24080343 FORWARDweakly similar to ( 158)HSP11_WHEAT gb|BQ246088;	-1.121
20.2.1	stress.abiotic.heat	ta.21910.2.s1_at	Transcript	very weakly similar to (90.5)AT5G59720| Symbols: | HSP18.2 (HEAT SHOCK PROTEIN 18.2) | chr5:24079858-24080343 FORWARDvery weakly similar to (83.2)HSP12_MEDSA gb|CA708152;	2.069
20.2.1	stress.abiotic.heat	ta.8665.1.s1_at	Transcript	weakly similar to ( 150)AT4G10250| Symbols: ATHSP22.0 | ATHSP22.0 (Arabidopsis thaliana heat shock protein 22.0) | chr4:6370533-6371120 FORWARDweakly similar to ( 161)HSP41_SOYBN gb|CD914539;	-1.188
20.2.1	stress.abiotic.heat	taaffx.87645.1.s1_at	Transcript	highly similar to ( 687)AT2G26890| Symbols: KAM2, GRV2 | GRV2 (KATAMARI2); binding / heat shock protein binding | chr2:11469405-11479337 REVERSE gb|CA731589;	-1.096
20.2.1	stress.abiotic.heat	ta.9140.1.a1_at	Transcript	moderately similar to ( 214)AT5G52640| Symbols: ATHSP90.1, ATHS83, HSP81.1, HSP83, HSP81-1 | HSP81-1 (HEAT SHOCK PROTEIN 81-1); ATP binding / unfolded protein binding | chr5:21369768-21372373 FORWARDmoderately similar to ( 218)HSP82_MAIZE gb|CA656847;	-1.057
20.2.1	stress.abiotic.heat	ta.28735.1.s1_a_at	Transcript	moderately similar to ( 446)AT4G24190| Symbols: SHD | SHD (SHEPHERD); ATP binding | chr4:12551912-12555861 REVERSEhighly similar to ( 540)ENPL_HORVUVAR1 COG5048 COG5099 COG4886 gb|BJ250459;	-1.033
20.2.1	stress.abiotic.heat	ta.2934.2.s1_a_at	Transcript	weakly similar to ( 141)AT1G79920| Symbols: | heat shock protein 70, putative / HSP70, putative | chr1:30064195-30067117 REVERSE gb|BJ292789;	-1.021
20.2.1	stress.abiotic.heat	taaffx.107458.1.s1_s_at	Transcript	very weakly similar to (93.6)AT5G28540| Symbols: BIP1 | BIP1; ATP binding | chr5:10540669-10543278 REVERSEvery weakly similar to (92.8)BIP5_TOBAC gb|CA699507;	-1.245
20.2.2	stress.abiotic.cold	taaffx.128796.1.s1_at	Transcript	weakly similar to ( 157)AT3G17020| Symbols: | universal stress protein (USP) family protein | chr3:5802734-5804069 REVERSE gb|CK196726;	1.743
20.2.3	stress.abiotic.drought/salt	taaffx.113733.1.s1_at	Transcript	weakly similar to ( 120)AT1G30360| Symbols: ERD4 | ERD4 (EARLY-RESPONSIVE TO DEHYDRATION 4) | chr1:10715874-10718781 FORWARD gb|CA606156;	-1.346
20.2.3	stress.abiotic.drought/salt	ta.6973.2.s1_at	Transcript	weakly similar to ( 191)AT4G02900| Symbols: | early-responsive to dehydration protein-related / ERD protein-related | chr4:1284066-1287747 FORWARD gb|BJ313299;	-1.127
20.2.99	stress.abiotic.unspecified	ta.3361.2.s1_x_at	Transcript	weakly similar to ( 103)AT1G24020| Symbols: MLP423 | MLP423 (MLP-LIKE PROTEIN 423) | chr1:8500642-8501447 REVERSE gb|BJ274638;	-1.066
20.2.99	stress.abiotic.unspecified	ta.22673.1.s1_s_at	Transcript	moderately similar to ( 208)AT1G18980| Symbols: | germin-like protein, putative | chr1:6557355-6558017 REVERSEmoderately similar to ( 422)GER2_WHEAT gb|M21962.1;	2.892
20.2.99	stress.abiotic.unspecified	ta.21085.1.s1_at	Transcript	weakly similar to ( 166)AT1G02335| Symbols: GL22 | GL22 (GERMIN-LIKE PROTEIN SUBFAMILY 2 MEMBER 2 PRECURSOR.); manganese ion binding / metal ion binding / nutrient reservoir | chr1:463979-464876 REVERSEweakly similar to ( 159)RHRE_PEA gb|CA645233;	-1.187

## Sheet: Cell
BinCode	BinName	id	type	description	log2FC
Cell_Organization
31.1	cell.organisation	ta.5566.2.s1_a_at	Transcript	moderately similar to ( 291)AT5G19780| Symbols: TUA5 | TUA5 (tubulin alpha-5) | chr5:6687214-6688928 FORWARDmoderately similar to ( 297)TBA1_HORVU gb|CA640502;	-1.006
31.1	cell.organisation	ta.5352.2.s1_at	Transcript	moderately similar to ( 335)AT2G35630| Symbols: GEM1, MOR1 | MOR1 (MICROTUBULE ORGANIZATION 1) | chr2:14973907-14987440 FORWARD gb|CK208861;	-1.344
31.4	cell.vesicle transport	ta.27318.1.s1_at	Transcript	highly similar to ( 695)AT4G11380| Symbols: | beta-adaptin, putative | chr4:6920603-6925439 FORWARDVAR1 COG5048 PRK08581 gb|BG908329;	-1.206
31.4	cell.vesicle transport	taaffx.104805.1.s1_at	Transcript	weakly similar to ( 146)AT1G79990| Symbols: | coatomer protein complex, subunit beta 2 (beta prime), putative | chr1:30090803-30096842 FORWARD gb|CA744534;	-1.232
31.4	cell.vesicle transport	ta.29355.1.s1_at	Transcript	highly similar to ( 807)AT4G34450| Symbols: | coatomer gamma-2 subunit, putative / gamma-2 coat protein, putative / gamma-2 COP, putative | chr4:16471960-16476799 FORWARD gb|CA663837;	-1.439
31.4	cell.vesicle transport	taaffx.31774.1.s1_at	Transcript	weakly similar to ( 140)AT3G15980| Symbols: | coatomer protein complex, subunit beta 2 (beta prime), putative | chr3:5412021-5418319 REVERSE gb|CA607903;	-1.421
31.4	cell.vesicle transport	ta.23734.3.s1_x_at	Transcript	very weakly similar to (97.4)AT4G31480| Symbols: | coatomer beta subunit, putative / beta-coat protein, putative / beta-COP, putative | chr4:15264082-15267390 FORWARD gb|CA605815;	-1.137
31.4	cell.vesicle transport	ta.7311.1.s1_x_at	Transcript	weakly similar to ( 158)AT3G60600| Symbols: VAP, (AT)VAP, VAP27, VAP27-1 | VAP27-1 (VAMP/SYNAPTOBREVIN-ASSOCIATED PROTEIN 27-1) | chr3:22411512-22412644 FORWARDVAR1 gb|CK196830;	-1.094
31.4	cell.vesicle transport	taaffx.31774.1.s1_x_at	Transcript	weakly similar to ( 140)AT3G15980| Symbols: | coatomer protein complex, subunit beta 2 (beta prime), putative | chr3:5412021-5418319 REVERSE gb|CA607903;	-1.137
31.4	cell.vesicle transport	ta.6441.2.s1_at	Transcript	moderately similar to ( 425)AT3G16270| Symbols: | binding | chr3:5513707-5516546 FORWARD gb|CD492016;	-1.249
31.4	cell.vesicle transport	ta.7311.3.s1_a_at	Transcript	weakly similar to ( 135)AT3G60600| Symbols: VAP, (AT)VAP, VAP27, VAP27-1 | VAP27-1 (VAMP/SYNAPTOBREVIN-ASSOCIATED PROTEIN 27-1) | chr3:22411512-22412644 FORWARD gb|CA639744;	1.071
31.4	cell.vesicle transport	taaffx.121446.3.s1_s_at	Transcript	weakly similar to ( 155)AT1G12360| Symbols: KEU | KEU (KEULE); protein transporter | chr1:4201170-4206142 FORWARDweakly similar to ( 170)SEC1A_ORYSA gb|CA692988;	-1.799
31.4	cell.vesicle transport	taaffx.93334.1.s1_at	Transcript	moderately similar to ( 272)AT5G03540| Symbols: ATEXO70A1 | ATEXO70A1 (EXOCYST SUBUNIT EXO70 FAMILY PROTEIN A1) | chr5:890193-893915 FORWARD gb|BJ222640;	-1.045
31.4	cell.vesicle transport	taaffx.85950.1.s1_at	Transcript	weakly similar to ( 147)AT3G10380| Symbols: SEC8 | SEC8 (secretion 8) | chr3:3219927-3228361 REVERSE gb|CA618167;	-1.396
31.4	cell.vesicle transport	ta.14195.3.s1_a_at	Transcript	weakly similar to ( 108)AT4G34450| Symbols: | coatomer gamma-2 subunit, putative / gamma-2 coat protein, putative / gamma-2 COP, putative | chr4:16471960-16476799 FORWARD gb|CA640695;	-1.108
31.4	cell.vesicle transport	ta.6942.2.s1_at	Transcript	highly similar to ( 731)AT1G52360| Symbols: | coatomer protein complex, subunit beta 2 (beta prime), putative | chr1:19502951-19509066 FORWARD gb|BJ226072;	-1.097
31.4	cell.vesicle transport	ta.23734.3.s1_a_at	Transcript	very weakly similar to (97.4)AT4G31480| Symbols: | coatomer beta subunit, putative / beta-coat protein, putative / beta-COP, putative | chr4:15264082-15267390 FORWARD gb|CA605815;	-1.161
31.4	cell.vesicle transport	taaffx.56430.1.s1_at	Transcript	weakly similar to ( 110)AT4G34450| Symbols: | coatomer gamma-2 subunit, putative / gamma-2 coat protein, putative / gamma-2 COP, putative | chr4:16471960-16476799 FORWARD gb|CA651828;	-1.165
Cell_transport
34.1.1	transport.p- and v-ATPases.H+-transporting two-sector ATPase	ta.1819.3.s1_x_at	Transcript	moderately similar to ( 426)AT4G38510| Symbols: | (VACUOLAR ATP SYNTHASE SUBUNIT B2); hydrogen ion transporting ATP synthase, rotational mechanism | chr4:18011149-18014783 REVERSEmoderately similar to ( 448)VATB1_HORVU gb|CA614241;	-1.16
34.1.1	transport.p- and v-ATPases.H+-transporting two-sector ATPase	ta.9647.2.s1_at	Transcript	highly similar to ( 577)AT4G38510| Symbols: | (VACUOLAR ATP SYNTHASE SUBUNIT B2); hydrogen ion transporting ATP synthase, rotational mechanism | chr4:18011149-18014783 REVERSEhighly similar to ( 579)VATB1_GOSHIVAR1 gb|CK161429;	-1.089
34.2	transporter.sugars	taaffx.95812.1.s1_s_at	Transcript	moderately similar to ( 252)AT3G43790| Symbols: ZIFL2 | ZIFL2 (ZINC INDUCED FACILITATOR-LIKE 2); carbohydrate transmembrane transporter/ sugar:hydrogen ion symporter | chr3:15666430-15669835 FORWARD gb|CA659779;	-1.189
34.3	transport.amino acids	ta.28479.1.s1_at	Transcript	weakly similar to ( 177)AT5G40780| Symbols: LTH1, LHT1 | LHT1 (LYSINE HISTIDINE TRANSPORTER 1); amino acid transmembrane transporter | chr5:16341051-16344310 FORWARDCOG5048 gb|BJ286275;	1.19
34.10	transport.nucleotides	ta.20676.2.s1_a_at	Transcript	very weakly similar to (89.0)AT4G09640| Symbols: | similar to permease-related [Arabidopsis thaliana] (TAIR:AT1G34470.1); similar to hypothetical protein [Vitis vinifera] (GB:CAN81783.1); contains InterPro domain Protein of unknown function DUF803 (InterPro:IPR008521) | chr4:6088430-6090601 REVERSE gb|CA593533;	-1.285
34.16	transport.ABC transporters and multidrug resistance systems	taaffx.95812.1.s1_s_at	Transcript	moderately similar to ( 252)AT3G43790| Symbols: ZIFL2 | ZIFL2 (ZINC INDUCED FACILITATOR-LIKE 2); carbohydrate transmembrane transporter/ sugar:hydrogen ion symporter | chr3:15666430-15669835 FORWARD gb|CA659779;	-1.189
34.16	transport.ABC transporters and multidrug resistance systems	taaffx.122077.1.s1_at	Transcript	moderately similar to ( 232)AT1G79600| Symbols: | ABC1 family protein | chr1:29954998-29957409 REVERSE gb|CA662233;	-1.064
34.16	transport.ABC transporters and multidrug resistance systems	taaffx.113404.1.s1_at	Transcript	weakly similar to ( 146)AT2G36380| Symbols: PDR6, ATPDR6 | ATPDR6/PDR6 (PLEIOTROPIC DRUG RESISTANCE 6); ATPase, coupled to transmembrane movement of substances | chr2:15264662-15270706 FORWARDweakly similar to ( 142)PDR1_TOBAC gb|CA613417;	-1.028
34.16	transport.ABC transporters and multidrug resistance systems	taaffx.101420.1.s1_at	Transcript	moderately similar to ( 301)AT2G26910| Symbols: PDR4, ATPDR4 | ATPDR4/PDR4 (PLEIOTROPIC DRUG RESISTANCE 4); ATPase, coupled to transmembrane movement of substances | chr2:11488701-11494952 FORWARDmoderately similar to ( 342)PDR6_ORYSA gb|CA599581;	-1.608
34.21	transport.calcium	ta.3864.2.s1_a_at	Transcript	weakly similar to ( 179)AT3G51860| Symbols: ATHCX1, CAX1-LIKE, ATCAX3, CAX3 | CAX3 (cation exchanger 3); cation:cation antiporter | chr3:19250435-19253496 FORWARDmoderately similar to ( 227)CAX1A_ORYSA gb|CA733260;	-1.119
34.99	transport.misc	taaffx.119486.1.s1_at	Transcript	weakly similar to ( 167)AT3G13050| Symbols: | transporter-related | chr3:4176873-4178875 FORWARD gb|BJ270568;	-1.07
34.99	transport.misc	taaffx.114210.2.s1_at	Transcript	weakly similar to ( 149)AT5G46150| Symbols: | LEM3 (ligand-effect modulator 3) family protein / CDC50 family protein | chr5:18725962-18727651 REVERSE gb|CA596768;	-1.069
34.99	transport.misc	ta.22618.1.s1_a_at	Transcript	weakly similar to ( 129)AT1G32050| Symbols: | secretory carrier membrane protein (SCAMP) family protein | chr1:11528596-11530954 FORWARD gb|CK212493;	1.016
34.99	transport.misc	ta.4103.2.s1_at	Transcript	weakly similar to ( 107)AT1G51340| Symbols: | MATE efflux family protein | chr1:19035702-19038349 FORWARD gb|BJ258950;	-1.116
Cell_development
33.1	development.storage proteins	ta.20518.3.s1_at	Transcript	very weakly similar to (99.4)AT3G22640| Symbols: | cupin family protein | chr3:8011909-8013890 REVERSEweakly similar to ( 131)GLB1_MAIZE gb|BJ297179;	2.082
33.2	development.late embryogenesis abundant	ta.13396.3.s1_at	Transcript	gb|CA740972;	1.591
33.2	development.late embryogenesis abundant	ta.6019.1.s1_at	Transcript	gb|BE517508;	1.167
33.2	development.late embryogenesis abundant	ta.23659.1.s1_at	Transcript	very weakly similar to ( 100)AT1G52690| Symbols: | late embryogenesis abundant protein, putative / LEA protein, putative | chr1:19623510-19624257 FORWARDweakly similar to ( 180)LEA1_HORVU gb|AY148491.1;	-1.22
33.99	development.unspecified	ta.14071.1.s1_x_at	Transcript	moderately similar to ( 243)AT1G21890| Symbols: | nodulin MtN21 family protein | chr1:7682797-7685570 REVERSE gb|CA637917;	1.876
33.99	development.unspecified	ta.25342.1.s1_at	Transcript	weakly similar to ( 108)AT2G42840| Symbols: PDF1 | PDF1 (PROTODERMAL FACTOR 1) | chr2:17833404-17834503 REVERSECOG3883 gb|BQ170230;	-1.147
33.99	development.unspecified	ta.21394.1.s1_at	Transcript	weakly similar to ( 105)AT2G42840| Symbols: PDF1 | PDF1 (PROTODERMAL FACTOR 1) | chr2:17833404-17834503 REVERSEVAR1 COG5048 gb|BJ215681;	-1.444
33.99	development.unspecified	ta.3634.2.s1_at	Transcript	weakly similar to ( 119)AT5G15890| Symbols: | similar to unknown protein [Arabidopsis thaliana] (TAIR:AT5G15900.1); similar to hypothetical protein [Cleome spinosa] (GB:ABD96865.1); contains InterPro domain Protein of unknown function DUF231, plant (InterPro:IPR004253) | chr5:5187690-5189351 REVERSEVAR1 gb|BQ789345;	-1.418
33.99	development.unspecified	taaffx.10176.1.s1_at	Transcript	weakly similar to ( 140)AT5G51230| Symbols: VEF2, CYR1, EMF2 | EMF2 (EMBRYONIC FLOWER 2) | chr5:20841379-20846570 FORWARD gb|BJ211655;	-1.066
33.99	development.unspecified	ta.11956.1.a1_at	Transcript	weakly similar to ( 103)AT2G42840| Symbols: PDF1 | PDF1 (PROTODERMAL FACTOR 1) | chr2:17833404-17834503 REVERSE gb|BQ171149;	1.589
33.99	development.unspecified	ta.765.1.s1_x_at	Transcript	very weakly similar to (89.4)AT5G25940| Symbols: | early nodulin-related | chr5:9054255-9055154 REVERSEvery weakly similar to (82.4)NO93_SOYBN gb|CA605374;	1.183
33.99	development.unspecified	ta.25342.1.s1_x_at	Transcript	weakly similar to ( 108)AT2G42840| Symbols: PDF1 | PDF1 (PROTODERMAL FACTOR 1) | chr2:17833404-17834503 REVERSECOG3883 gb|BQ170230;	-1.097
33.99	development.unspecified	ta.8277.1.a1_at	Transcript	weakly similar to ( 180)AT5G07050| Symbols: | nodulin MtN21 family protein | chr5:2191534-2193417 REVERSE gb|BQ161684;	1.151
33.99	development.unspecified	taaffx.84069.1.s1_at	Transcript	very weakly similar to (87.4)AT1G75900| Symbols: | family II extracellular lipase 3 (EXL3) | chr1:28502840-28504604 FORWARD gb|CA645540;	-1.368
33.99	development.unspecified	taaffx.106850.1.s1_at	Transcript	weakly similar to ( 145)AT4G10180| Symbols: FUS2, DET1 | DET1 (DE-ETIOLATED 1); catalytic | chr4:6346539-6349142 FORWARD gb|CA594111;	-1.318
33.99	development.unspecified	taaffx.109230.1.s1_at	Transcript	weakly similar to ( 104)AT2G47070| Symbols: SPL1 | SPL1 (SQUAMOSA PROMOTER BINDING PROTEIN-LIKE 1); DNA binding / transcription factor | chr2:19344214-19347622 FORWARD gb|CA604393;	-1.12
Cell_regulation
30.2.5	signalling.receptor kinases.leucine rich repeat V	taaffx.12013.1.s1_at	Transcript	weakly similar to ( 188)AT4G03390| Symbols: SRF3 | SRF3 (STRUBBELIG-RECEPTOR FAMILY 3); ATP binding / kinase/ protein serine/threonine kinase | chr4:1490911-1494552 REVERSEvery weakly similar to (81.3)RPK1_IPONI gb|BJ304131;	-1.257
30.2.11	signalling.receptor kinases.leucine rich repeat XI	ta.20516.1.s1_x_at	Transcript	moderately similar to ( 209)AT5G06860| Symbols: PGIP1 | PGIP1 (POLYGALACTURONASE INHIBITING PROTEIN 1); protein binding | chr5:2132374-2133435 FORWARDweakly similar to ( 172)PGIP3_PHAVU gb|CA635174;	1.677
30.2.12	signalling.receptor kinases.leucine rich repeat XII	taaffx.53376.1.s1_at	Transcript	weakly similar to ( 121)AT3G47570| Symbols: | leucine-rich repeat transmembrane protein kinase, putative | chr3:17538596-17541733 FORWARD gb|CA747224;	1.292
30.2.25	signalling.receptor kinases.wall associated kinase	ta.27859.1.a1_at	Transcript	very weakly similar to (87.0)AT1G21240| Symbols: WAK3 | WAK3 (WALL ASSOCIATED KINASE 3); kinase/ protein serine/threonine kinase | chr1:7434292-7436691 FORWARD gb|CD922428;	1.08
30.2.99	signalling.receptor kinases.misc	ta.6542.1.a1_at	Transcript	moderately similar to ( 368)AT2G37050| Symbols: | similar to leucine-rich repeat family protein / protein kinase family protein [Arabidopsis thaliana] (TAIR:AT1G67720.1); similar to leucine-rich repeat family protein, putative, expressed [Oryza sativa (japonica cultivar-group)] (GB:ABA95578.2); similar to hypothetical protein [Vitis vinifera] (GB:CAN67050.1); similar to unnamed protein product [V…	-1.03
30.2.99	signalling.receptor kinases.misc	taaffx.91949.1.s1_at	Transcript	weakly similar to ( 153)AT2G37050| Symbols: | similar to leucine-rich repeat family protein / protein kinase family protein [Arabidopsis thaliana] (TAIR:AT1G67720.1); similar to leucine-rich repeat family protein, putative, expressed [Oryza sativa (japonica cultivar-group)] (GB:ABA95578.2); similar to hypothetical protein [Vitis vinifera] (GB:CAN67050.1); similar to unnamed protein product [Vitis…	-1.004
30.3	signalling.calcium	ta.23807.10.s1_at	Transcript	weakly similar to ( 154)AT5G62390| Symbols: ATBAG7 | ATBAG7 (ARABIDOPSIS THALIANA BCL-2-ASSOCIATED ATHANOGENE 7); calmodulin binding | chr5:25069603-25071396 REVERSE gb|BJ272735;	-1.452
30.3	signalling.calcium	ta.9309.1.a1_x_at	Transcript	weakly similar to ( 111)AT1G19870| Symbols: IQD32 | IQD32 (IQ-domain 32); calmodulin binding | chr1:6895391-6898530 REVERSE VAR1 COG5048 MopB_Res-Cmplx1_Nad11-M COG4886 gb|CK157795;	-1.093
30.5	signalling.G-proteins	ta.10235.1.s1_at	Transcript	weakly similar to ( 134)AT5G41940| Symbols: | RabGAP/TBC domain-containing protein | chr5:16799267-16802679 FORWARD gb|BJ246114;	1.034
30.5	signalling.G-proteins	ta.10419.1.s1_at	Transcript	moderately similar to ( 324)AT4G29830| Symbols: VIP3 | VIP3 (VERNALIZATION INDEPENDENCE 3); nucleotide binding | chr4:14597734-14599163 FORWARD gb|CD454624;	-2.596
30.5	signalling.G-proteins	ta.5076.2.s1_at	Transcript	moderately similar to ( 271)AT3G43300| Symbols: ATMIN7 | ATMIN7 (ARABIDOPSIS THALIANA HOPM INTERACTOR 7); guanyl-nucleotide exchange factor/ protein binding | chr3:15245223-15256022 REVERSE gb|BJ213391;	-1.987
30.6	signalling.MAP kinases	ta.4456.1.s1_at	Transcript	moderately similar to ( 487)AT2G42880| Symbols: ATMPK20 | ATMPK20 (Arabidopsis thaliana MAP kinase 20); MAP kinase | chr2:17847649-17851024 REVERSEhighly similar to ( 518)MPK8_ORYSA gb|AJ606017.1;	-1.211

[truncated: 5 more sheets: Enzymes, Protein, RNA, DNA, Unknown]
